# Supplementary material for: Synthesis and reactivity of iridium complexes of a macrocyclic PNP pincer ligand
Source: Royal Society of Chemistry journal article supplement (doi:10.1039/d0dt04303f), 2021-01-01
Supplement: d0dt04303f1.zip [file d0dt04303f1.zip]

## Synthesis and reactivity of iridium complexes of a macrocyclic PNP pincer ligand

Thomas M. Hood and Adrian B. Chaplin\*

Department of Chemistry, University of Warwick, Gibbet Hill Road, Coventry CV4 7AL, UK

Email: [a.b.chaplin@warwick.ac.uk](mailto:a.b.chaplin@warwick.ac.uk)

### Table of Contents

|     |                                                                                                                                                                                                                |    |
|-----|----------------------------------------------------------------------------------------------------------------------------------------------------------------------------------------------------------------|----|
| 1   | Preparation of $[\text{Ir}(\text{PNP-14})(\eta^2:\eta^2\text{-COD})][\text{BAR}^{\text{F}}_4]$ ( <b>1</b> ) .....                                                                                              | 2  |
| 2   | NMR scale reaction of <b>1</b> with dihydrogen .....                                                                                                                                                           | 3  |
| 3   | Preparation of $[\text{Ir}(\text{PNP-14})(\text{biph})][\text{BAR}^{\text{F}}_4]$ ( <b>2</b> ) .....                                                                                                           | 4  |
| 4   | NMR scale reactions of <b>2</b> .....                                                                                                                                                                          | 6  |
| 4.1 | Synthesis of $[\text{Ir}(\text{PNP-14})(2\text{-biphenyl})\text{H}][\text{BAR}^{\text{F}}_4]$ ( <b>3</b> ) .....                                                                                               | 6  |
| 4.2 | Synthesis of $[\text{Ir}(\text{PNP-14})\text{H}_2(\text{H}_2)][\text{BAR}^{\text{F}}_4]$ ( <b>4</b> ) .....                                                                                                    | 7  |
| 4.3 | Synthesis of $[\text{Ir}(\text{PNP-14})\text{H}_2(\text{C}_2\text{H}_4)][\text{BAR}^{\text{F}}_4]$ ( <b>5</b> ) .....                                                                                          | 8  |
| 4.4 | Synthesis of $[\text{Ir}(\text{PNP-14})(\text{C}_2\text{H}_4)_2][\text{BAR}^{\text{F}}_4]$ ( <b>6</b> ) .....                                                                                                  | 9  |
| 4.5 | Synthesis and isolation of $[\text{Ir}(\text{PNP-14})(\text{CO})][\text{BAR}^{\text{F}}_4]$ ( <b>8</b> ) .....                                                                                                 | 10 |
| 5   | NMR scale reaction of $[\text{Ir}(\text{PNP-}t\text{Bu})(\text{biph})][\text{BAR}^{\text{F}}_4]$ ( <b>II</b> ) with dihydrogen .....                                                                           | 12 |
| 6   | Preparation of $[\text{Ir}(\text{PNP-14}^*)\text{H}][\text{BAR}^{\text{F}}_4]$ ( <b>7</b> ) .....                                                                                                              | 13 |
| 7   | NMR scale reaction of <b>7</b> with dihydrogen .....                                                                                                                                                           | 15 |
| 8   | Catalytic homocoupling of 3,3-dimethylbutyne promoted by <b>1</b> .....                                                                                                                                        | 16 |
| 9   | Catalytic homocoupling of 3,3-dimethylbutyne promoted by <b>6</b> .....                                                                                                                                        | 19 |
| 10  | Preparation of $[\text{Ir}(\text{PNP-14})(\eta^3\text{-}E\text{-C}(\text{C}\equiv\text{C}t\text{Bu})\text{CH}t\text{Bu})(\eta^1\text{-}E\text{-CHCH}t\text{Bu})][\text{BAR}^{\text{F}}_4]$ ( <b>10</b> ) ..... | 21 |
| 11  | NMR scale reaction of <b>1</b> with $Z\text{-}t\text{BuC}\equiv\text{CCHCH}t\text{Bu}$ .....                                                                                                                   | 24 |
| 12  | Synthesis and characterisation of $[\text{Rh}(\text{PNP-14})(\eta^2\text{-norbornene})][\text{BAR}^{\text{F}}_4]$ .....                                                                                        | 24 |

# 1 Preparation of $[\text{Ir}(\text{PNP-14})(\eta^2\text{-}\eta^2\text{-COD})][\text{BAR}^{\text{F}}_4]$ (1)

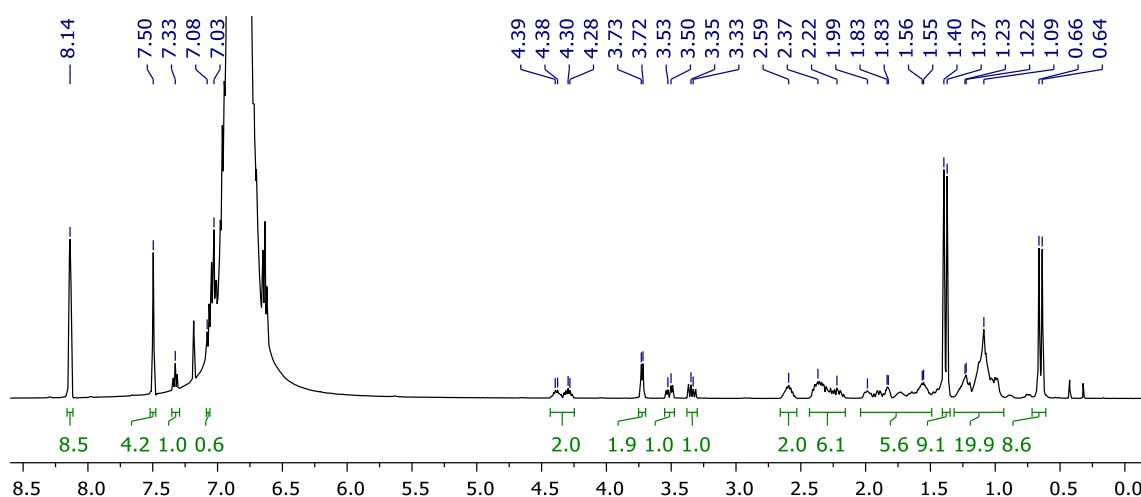

Figure S1.  $^1\text{H}$  NMR spectrum of **1** (DFB, 500 MHz).

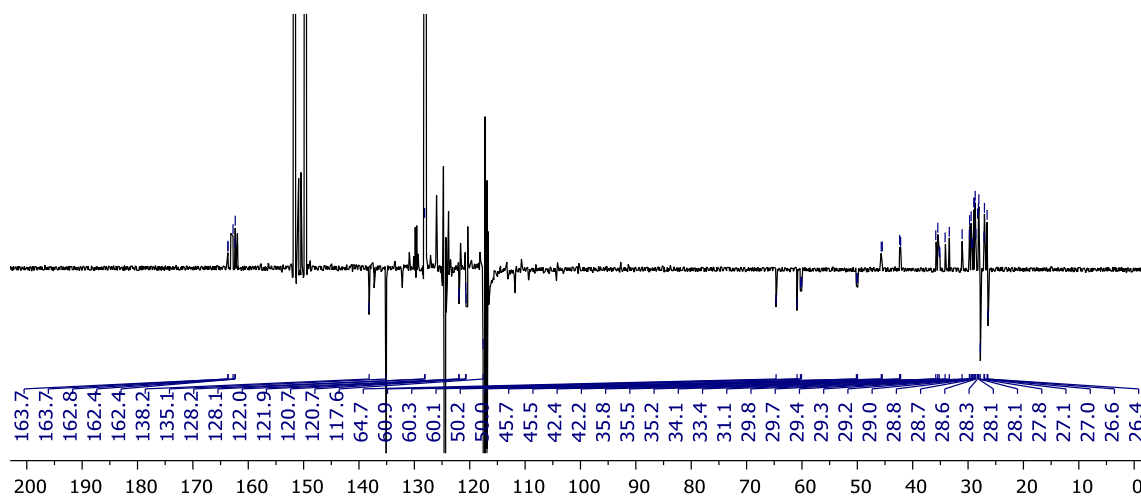

Figure S2.  $^{13}\text{C}\{^1\text{H}\}$  APT NMR spectrum of **1** (DFB, 126 MHz).

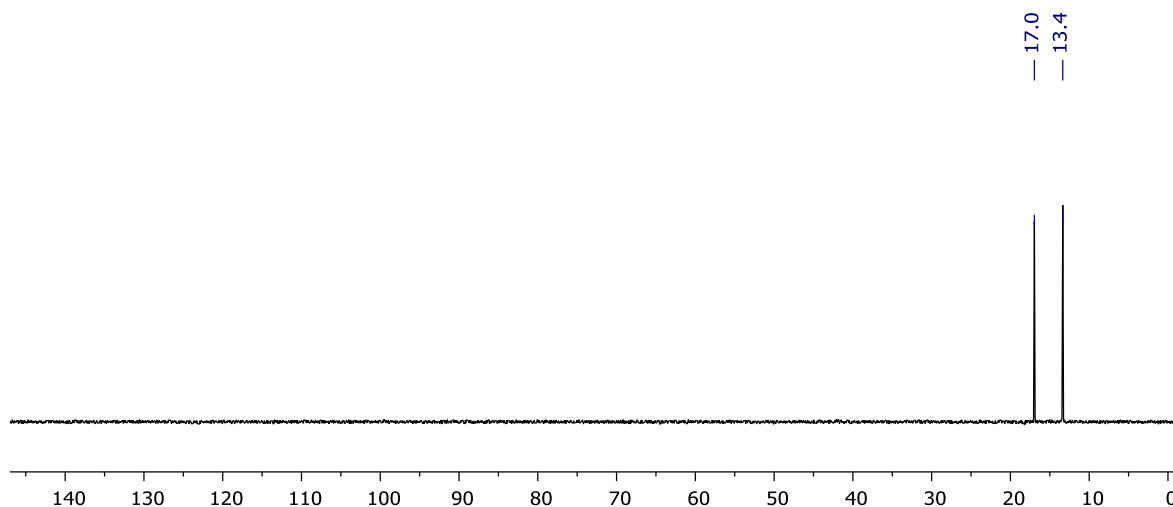

Figure S3.  $^{31}\text{P}\{^1\text{H}\}$  NMR spectrum of **1** (DFB, 162 MHz).

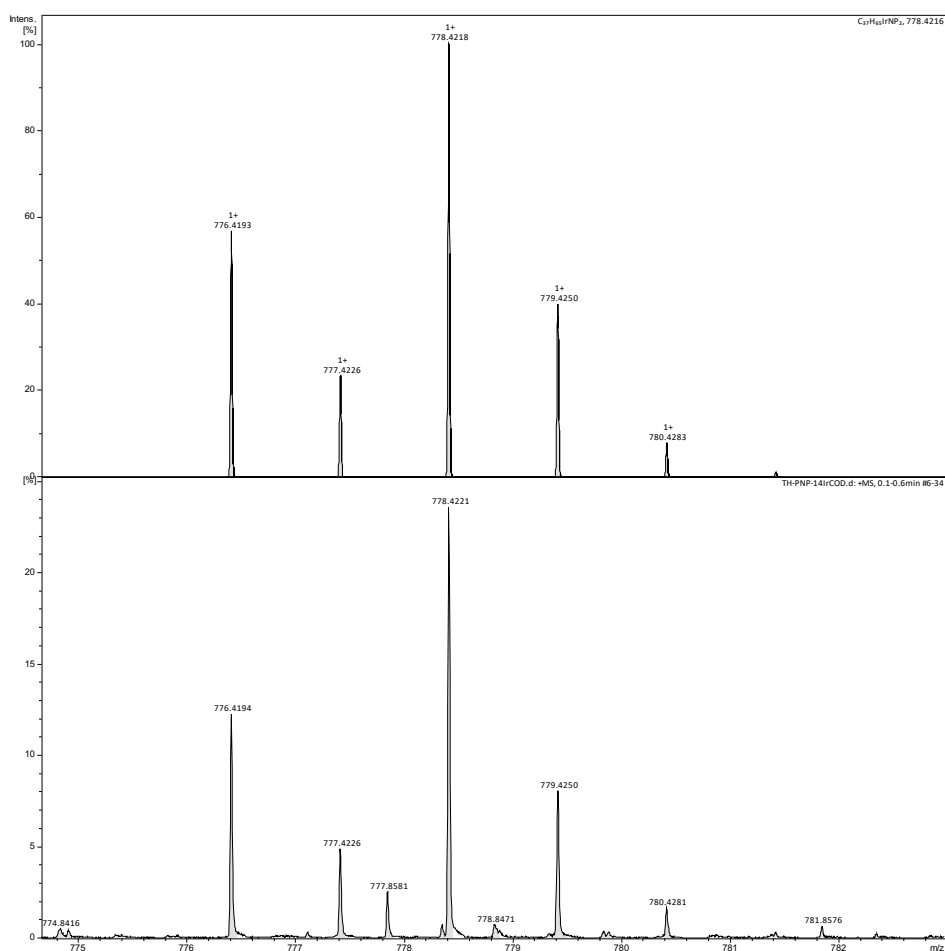

Figure S4. HR ESI-MS of 1.

## 2 NMR scale reaction of 1 with dihydrogen

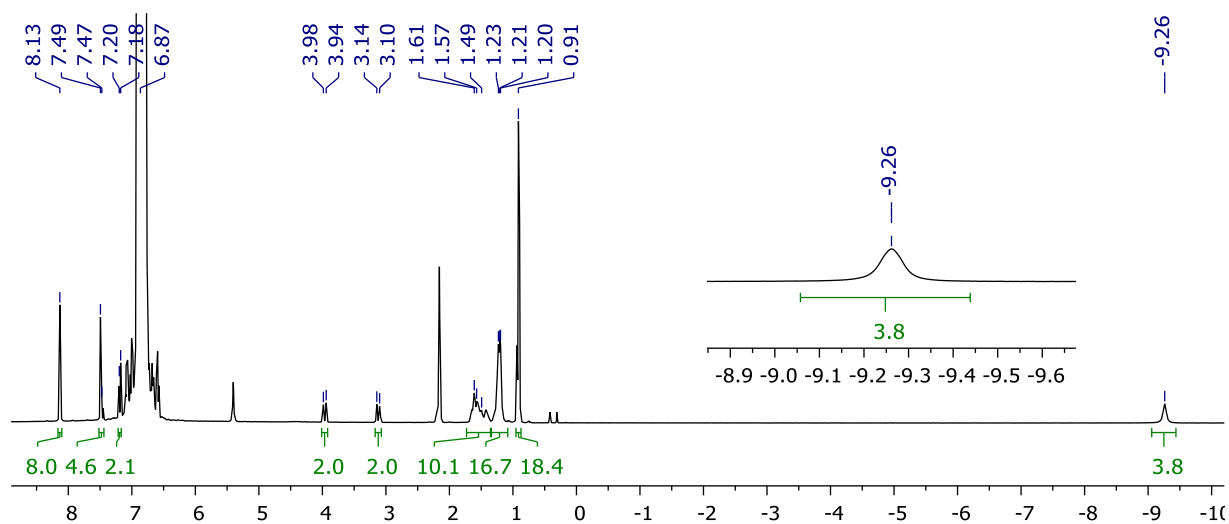

Figure S5.  $^1\text{H}$  NMR spectrum showing formation of 4 (DFB, 400 MHz).

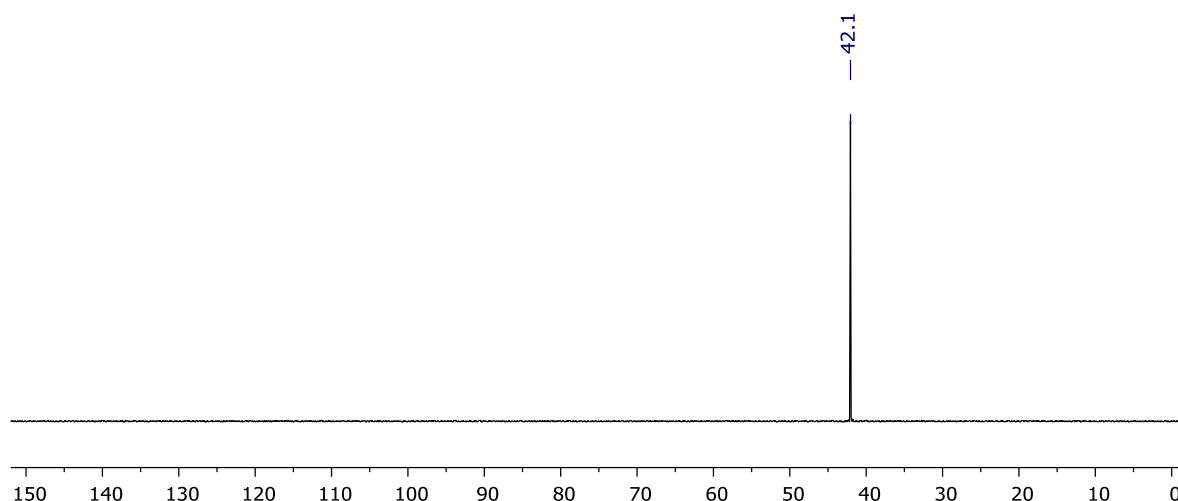

**Figure S6.**  $^{31}\text{P}\{^1\text{H}\}$  NMR spectrum showing formation of **4** (DFB, 162 MHz).

### 3 Preparation of $[\text{Ir}(\text{PNP-14})(\text{biph})][\text{BAR}^{\text{F}}_4]$ (**2**)

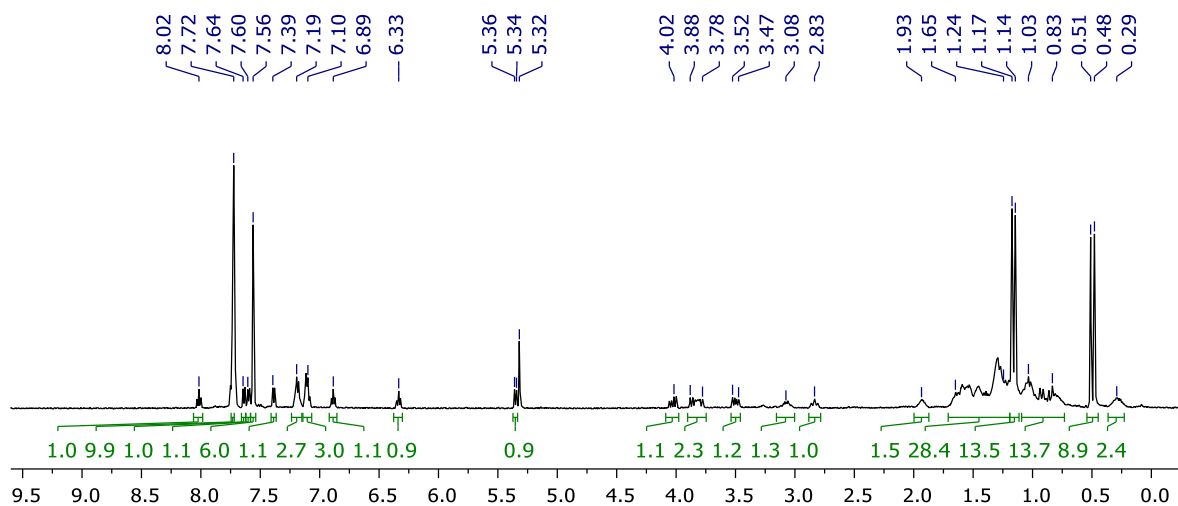

**Figure S7.**  $^1\text{H}$  NMR spectrum of **2** (DFB, 500 MHz).

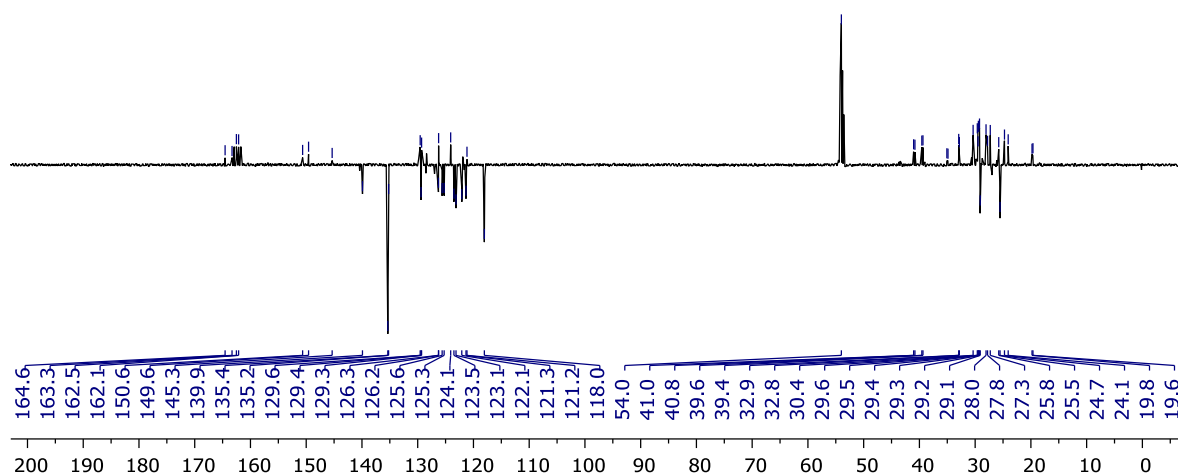

**Figure S8.**  $^{13}\text{C}\{^1\text{H}\}$  APT NMR spectrum of **2** (DFB, 126 MHz).

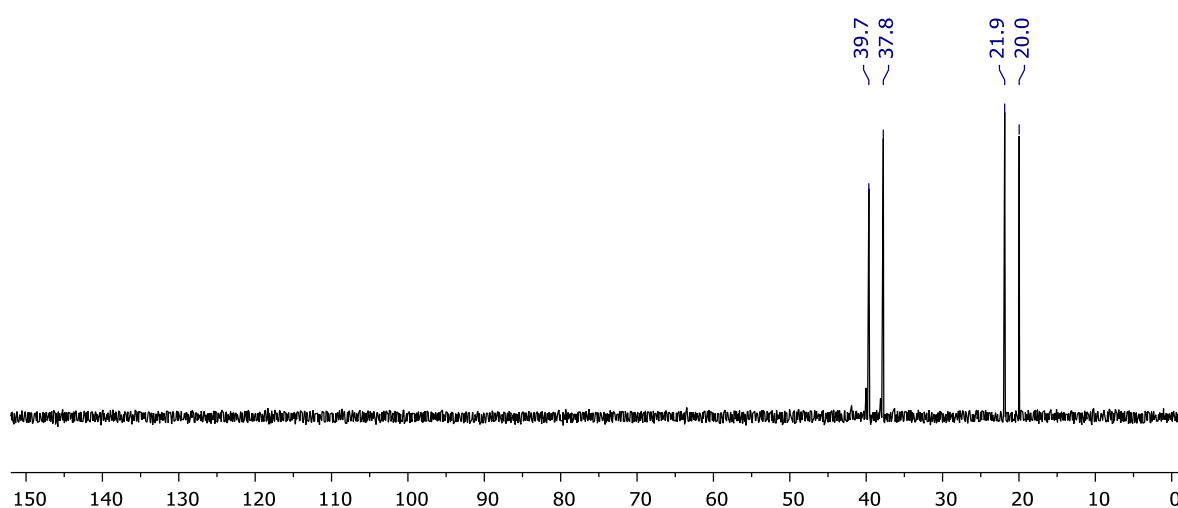

**Figure S9.**  $^{31}\text{P}\{^1\text{H}\}$  NMR spectrum of **2** (DFB, 162 MHz).

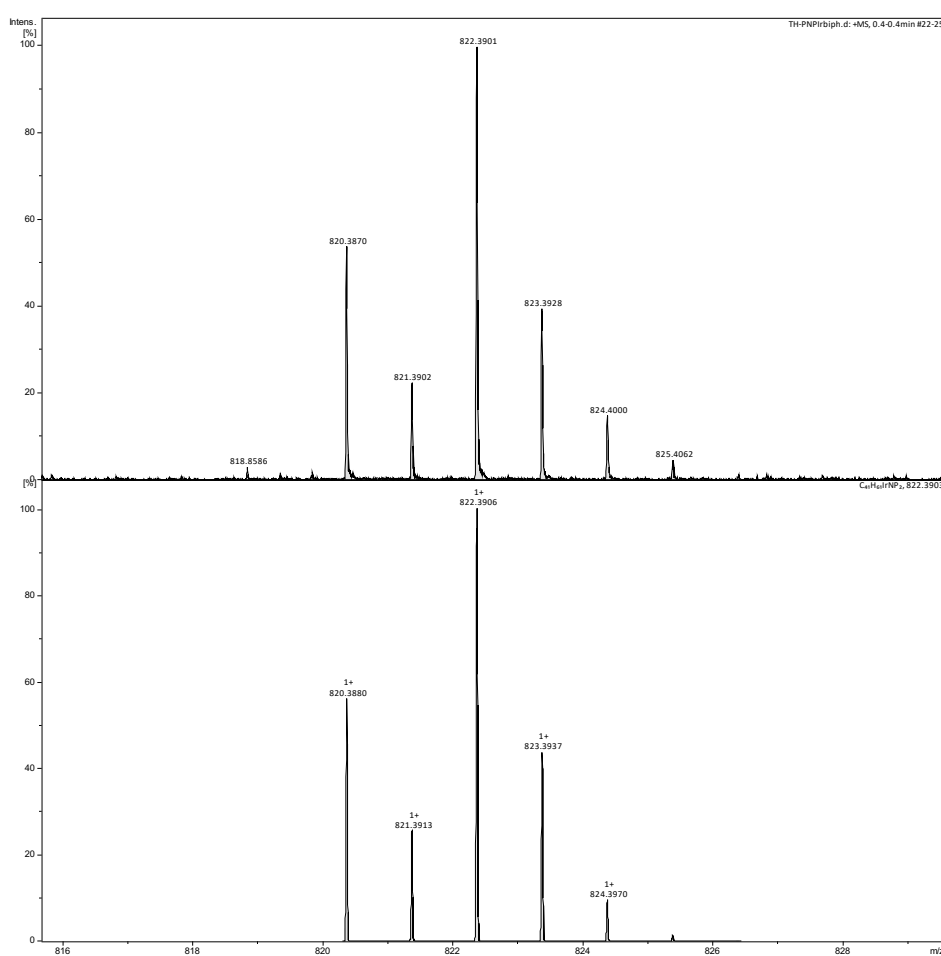

**Figure S10.** HR ESI-MS of **2**.

## 4 NMR scale reactions of 2

### 4.1 Synthesis of $[\text{Ir}(\text{PNP-14})(2\text{-biphenyl})\text{H}][\text{BAr}^{\text{F}}_4]$ (**3**)

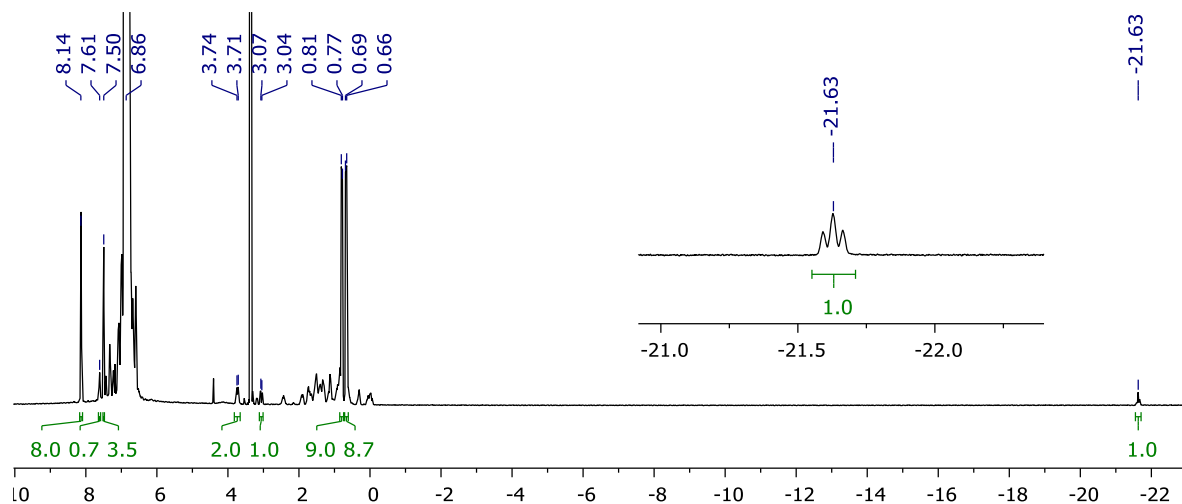

Figure S11.  $^1\text{H}$  NMR spectrum showing formation of **3** (DFB, 400 MHz).

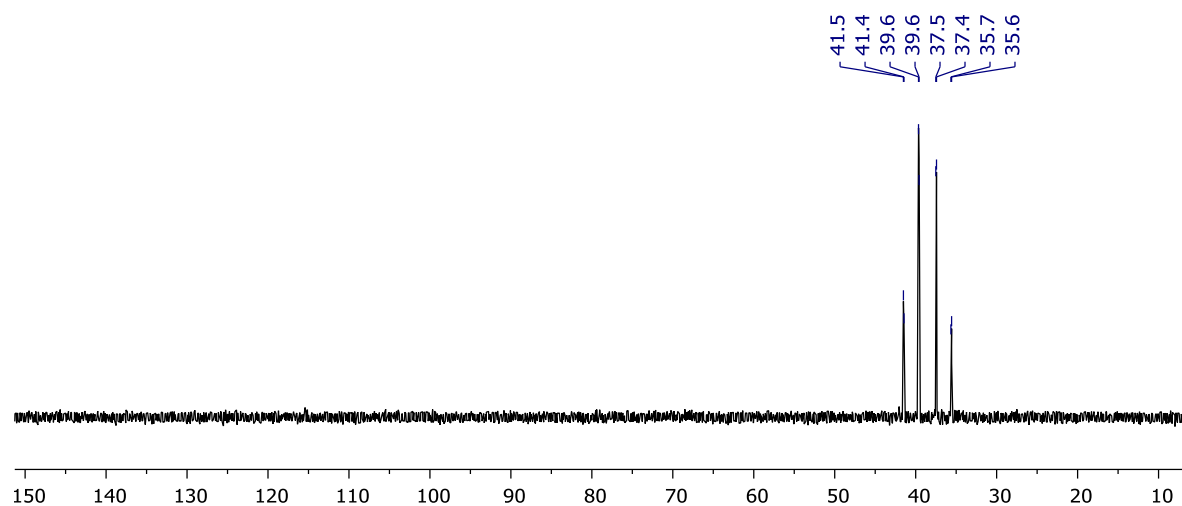

Figure S12.  $^{31}\text{P}\{^1\text{H}\}$  NMR spectrum showing formation of **3** (DFB, 162 MHz).

## 4.2 Synthesis of $[\text{Ir}(\text{PNP-14})\text{H}_2(\text{H}_2)][\text{BAr}^{\text{F}}_4]$ (**4**)

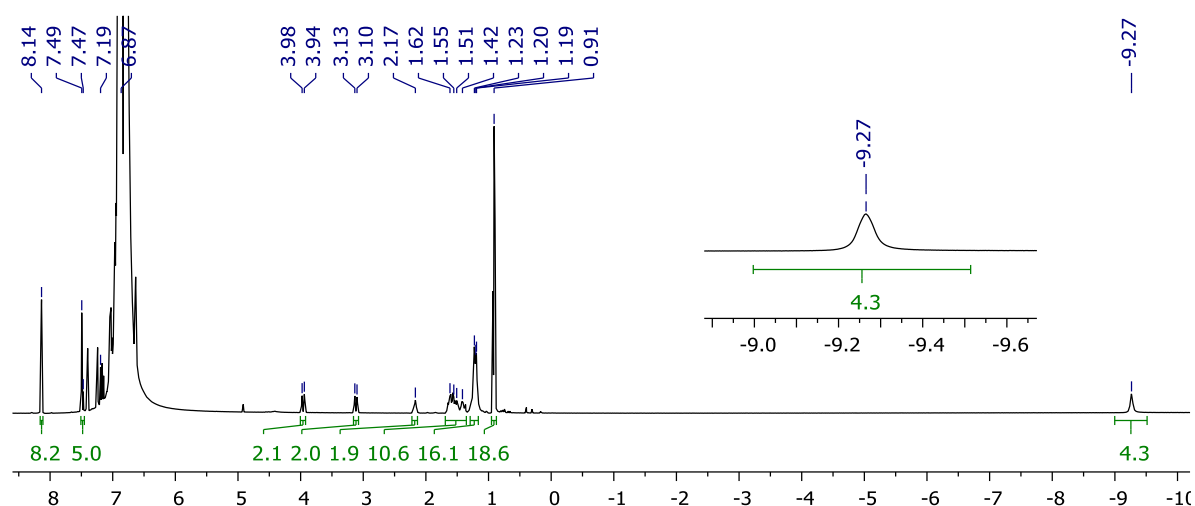

**Figure S13.**  $^1\text{H}$  NMR spectrum showing formation of **4** (DFB, 500 MHz).

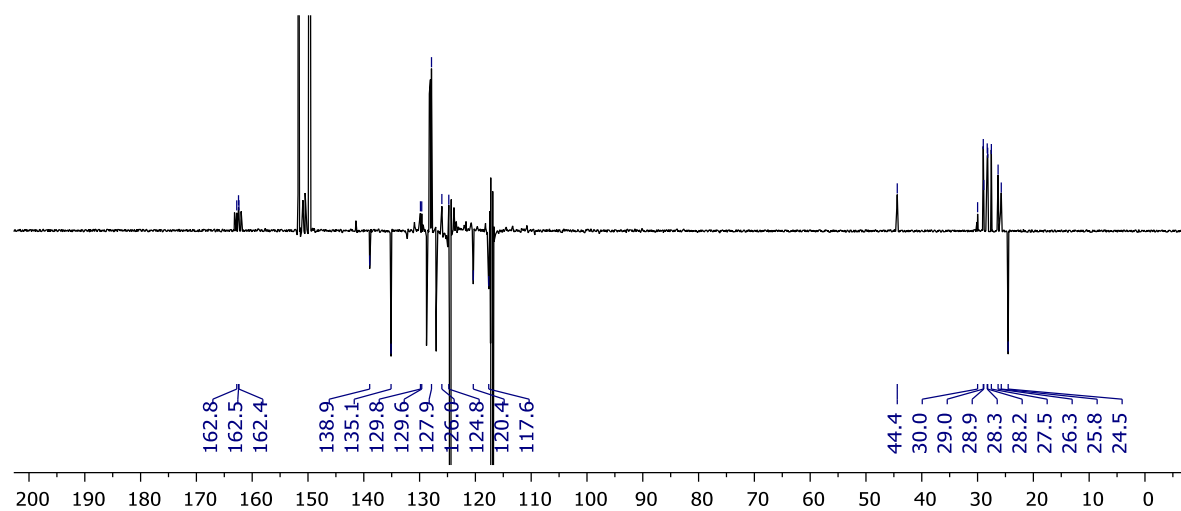

**Figure S14.**  $^{13}\text{C}\{^1\text{H}\}$  APT NMR spectrum showing formation of **4** (DFB, 126 MHz).

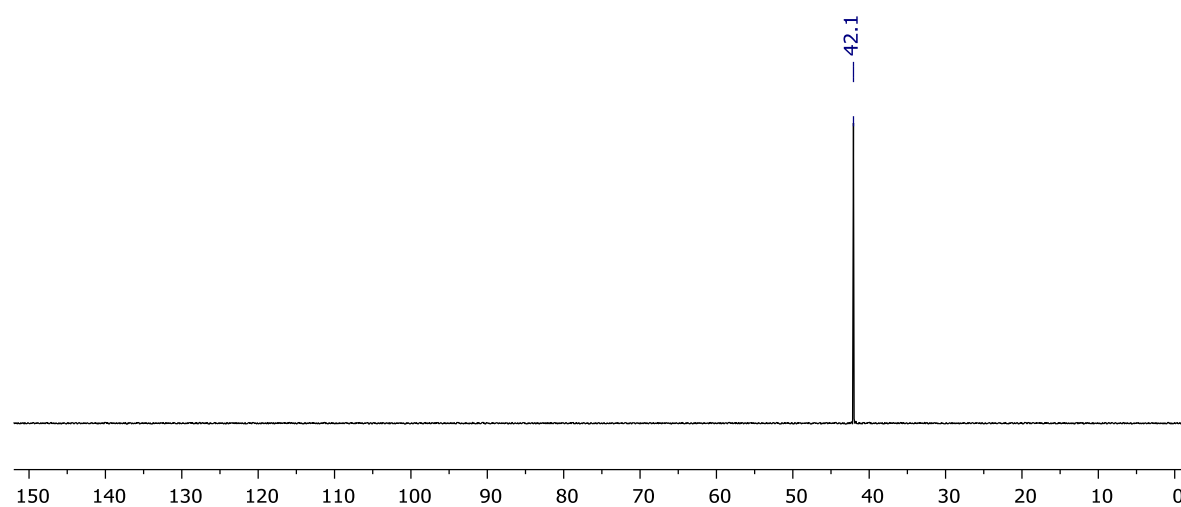

**Figure S15.**  $^{31}\text{P}\{^1\text{H}\}$  NMR spectrum showing formation of **4** (DFB, 162 MHz).

### 4.3 Synthesis of $[\text{Ir}(\text{PNP-14})\text{H}_2(\text{C}_2\text{H}_4)][\text{BAr}^{\text{F}}_4]$ (**5**)

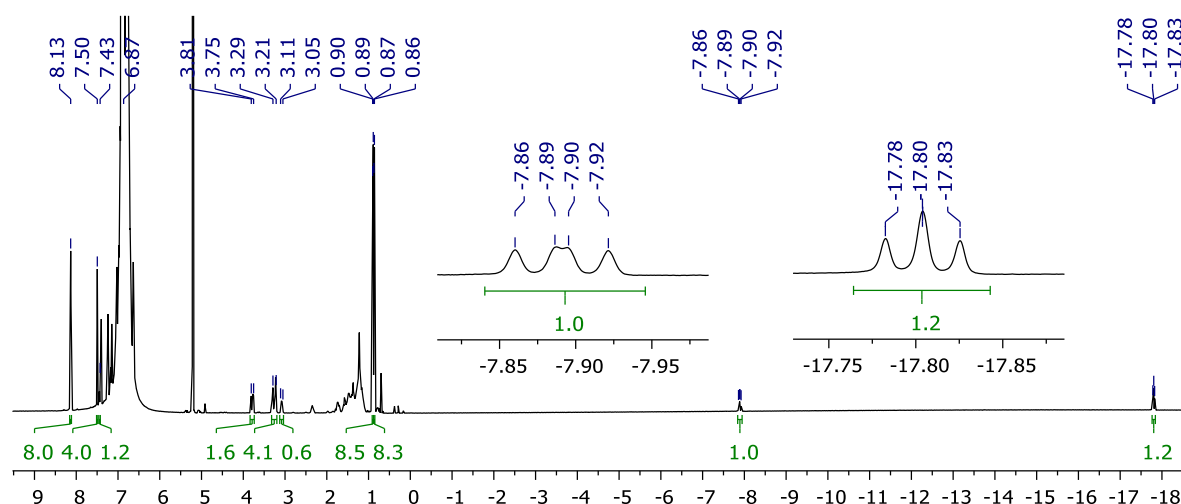

**Figure S16.** <sup>1</sup>H NMR spectrum showing formation of **5** (DFB, 500 MHz).

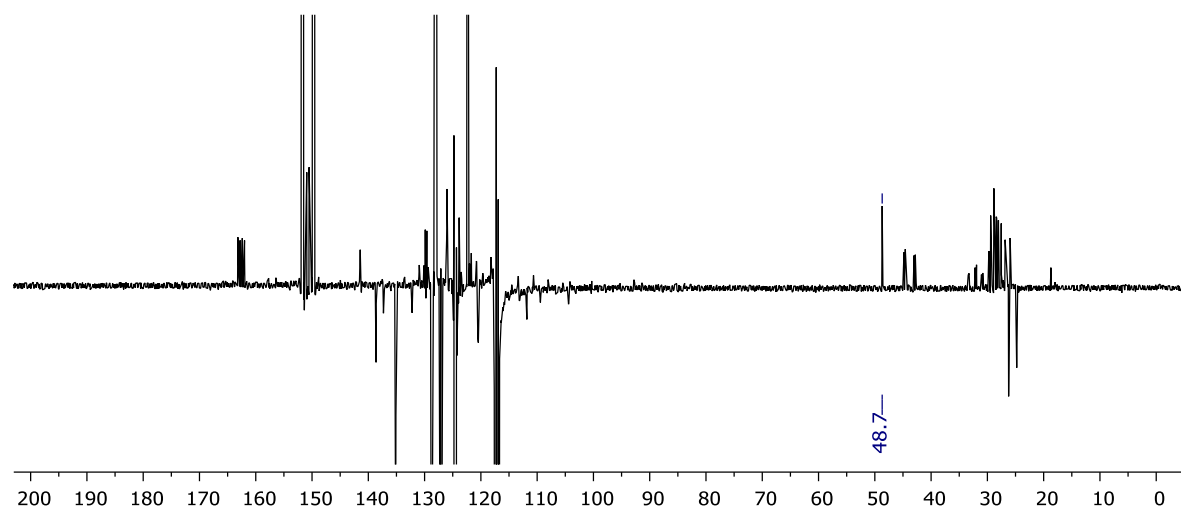

**Figure S17.** <sup>13</sup>C{<sup>1</sup>H} APT NMR spectrum showing formation of **5** (DFB, 126 MHz).

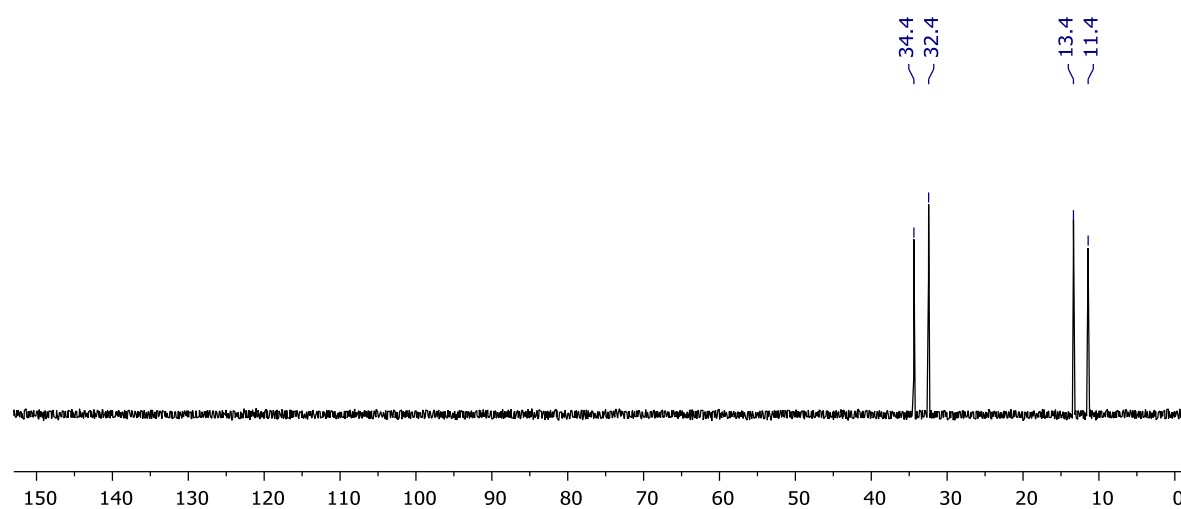

**Figure S18.** <sup>31</sup>P{<sup>1</sup>H} NMR spectrum showing formation of **5** (DFB, 162 MHz).



#### 4.4 Synthesis of $[\text{Ir}(\text{PNP-14})(\text{C}_2\text{H}_4)_2][\text{BAR}^{\text{F}}_4]$ (**6**)

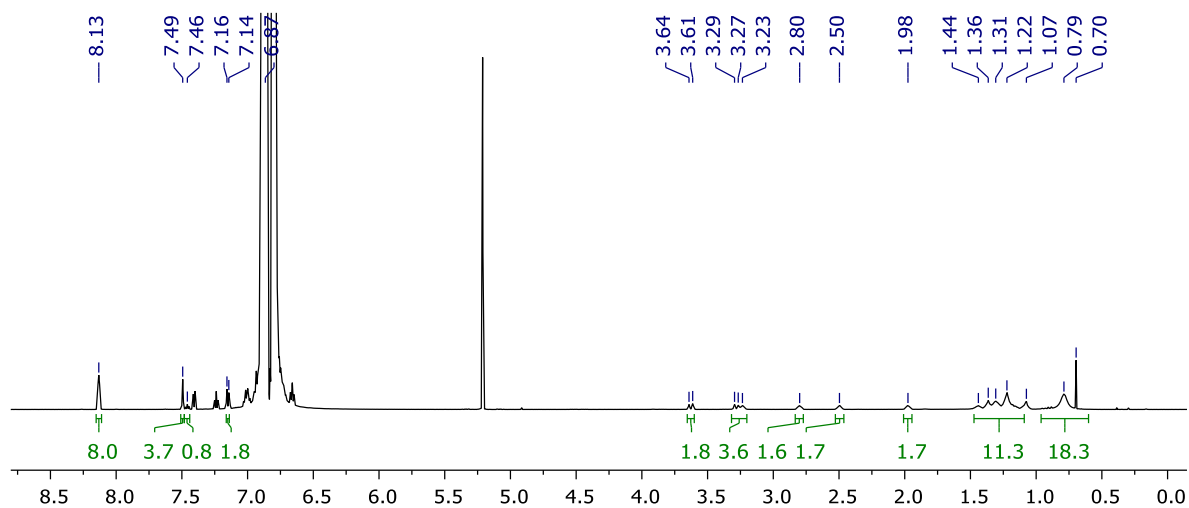

**Figure S19.**  $^1\text{H}$  NMR spectrum showing formation of **6** (DFB, 600 MHz).

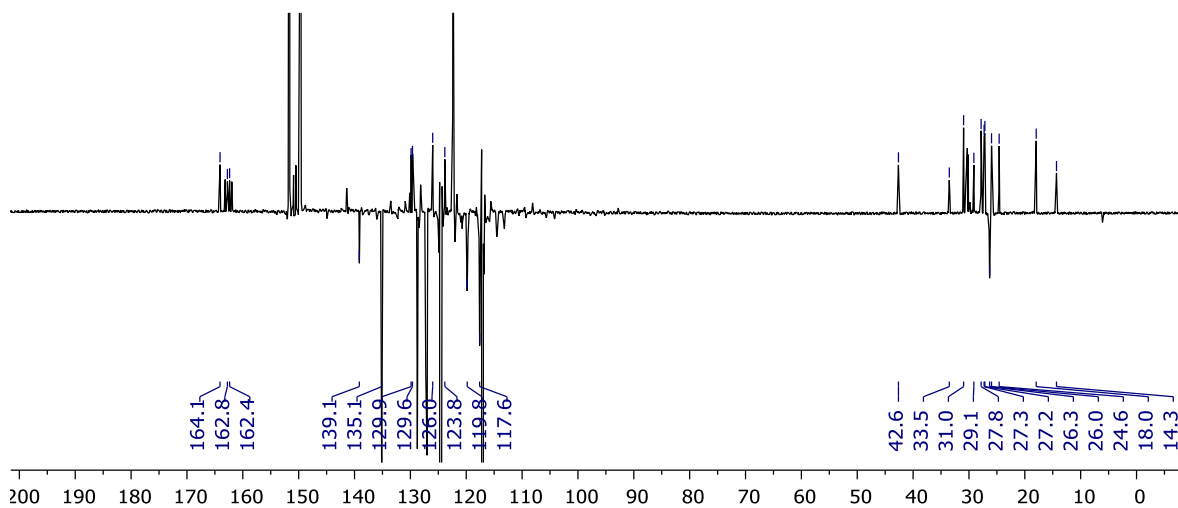

**Figure S20.**  $^{13}\text{C}\{^1\text{H}\}$  APT NMR spectrum showing formation of **6** (DFB, 126 MHz).

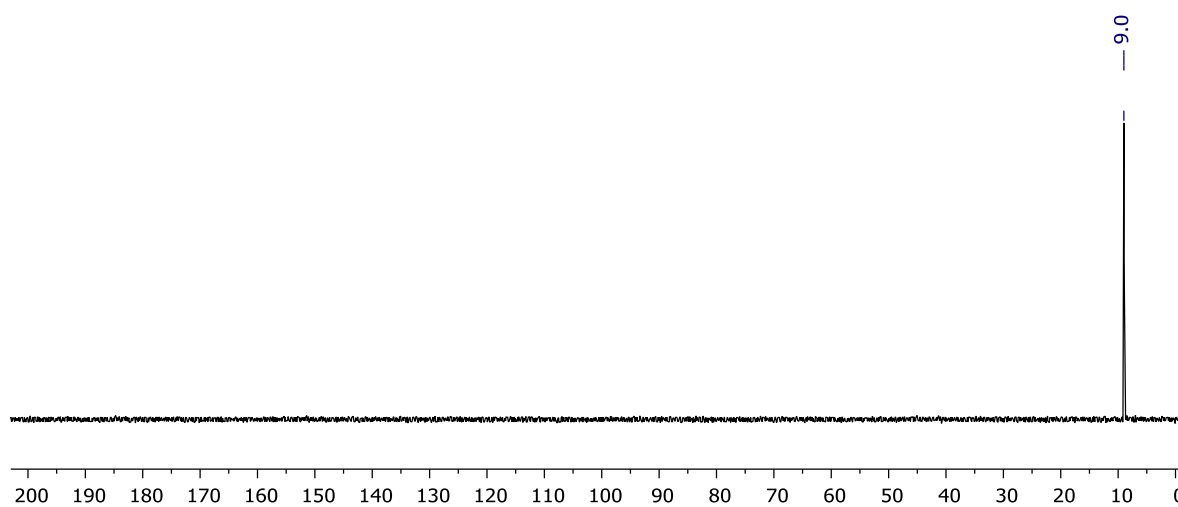

**Figure S21.**  $^{31}\text{P}\{^1\text{H}\}$  NMR spectrum showing formation of **6** (DFB, 162 MHz).

#### 4.5 Synthesis and isolation of $[\text{Ir}(\text{PNP-14})(\text{CO})][\text{BAR}^{\text{F}}_4]$ (**8**)

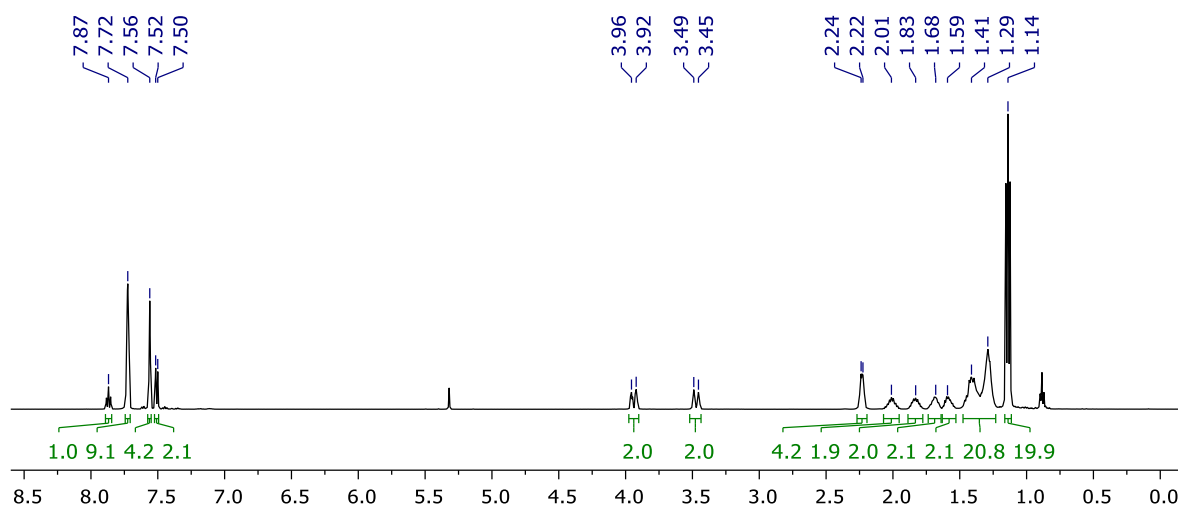

**Figure S22.**  $^1\text{H}$  NMR spectrum of isolated **8** ( $\text{CD}_2\text{Cl}_2$ , 500 MHz).

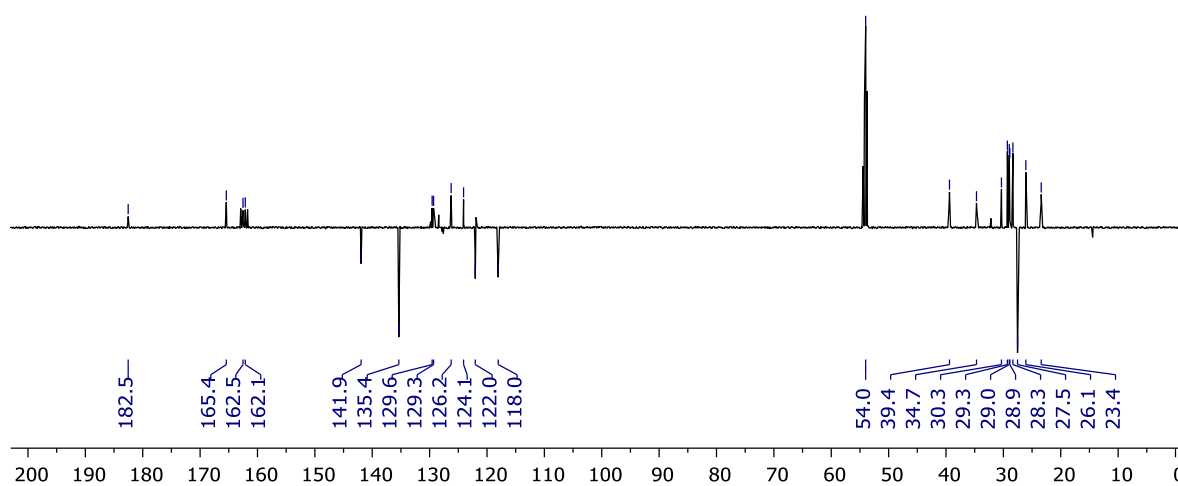

**Figure S23.**  $^{13}\text{C}\{^1\text{H}\}$  APT NMR spectrum of isolated **8** ( $\text{CD}_2\text{Cl}_2$ , 126 MHz).

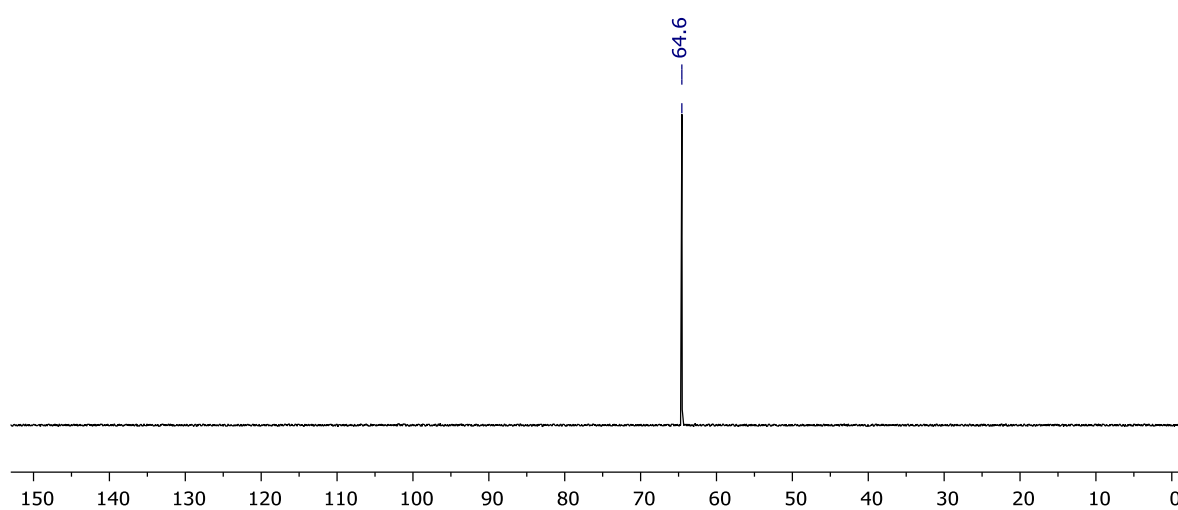

**Figure S24.**  $^{31}\text{P}\{^1\text{H}\}$  NMR spectrum of isolated **8** ( $\text{CD}_2\text{Cl}_2$ , 162 MHz).

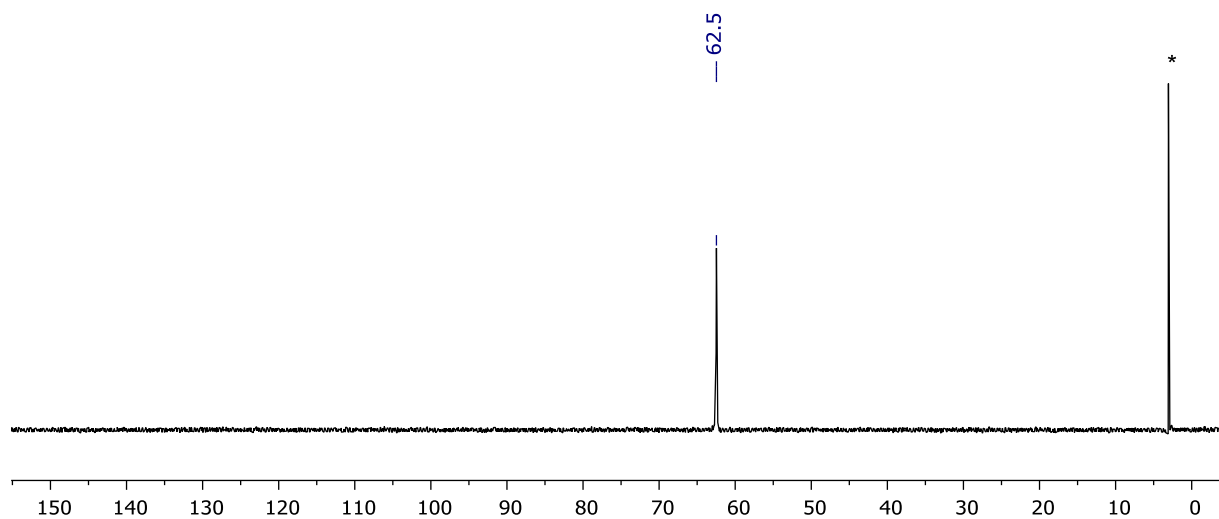

**Figure S25.**  $^{31}\text{P}\{^1\text{H}\}$  NMR spectrum of isolated **8** (DFB, 162 MHz). \* = internal reference.

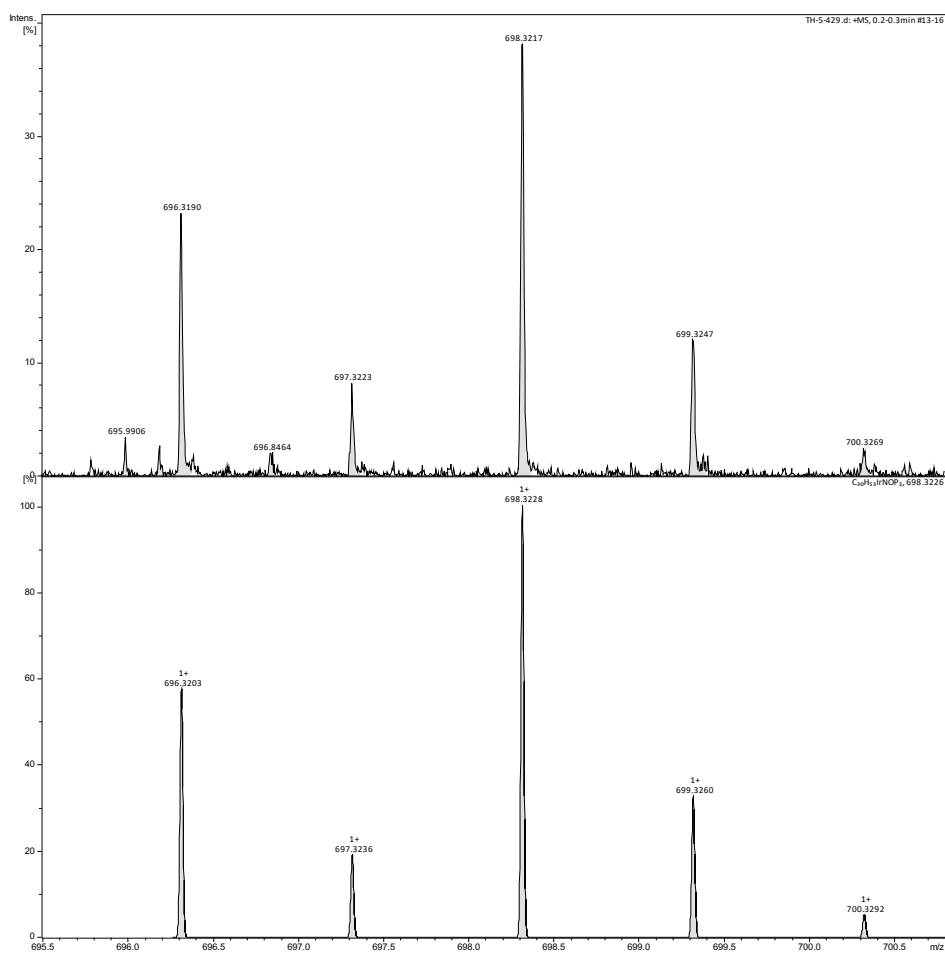

**Figure S26.** HR ESI-MS of isolated **8**.

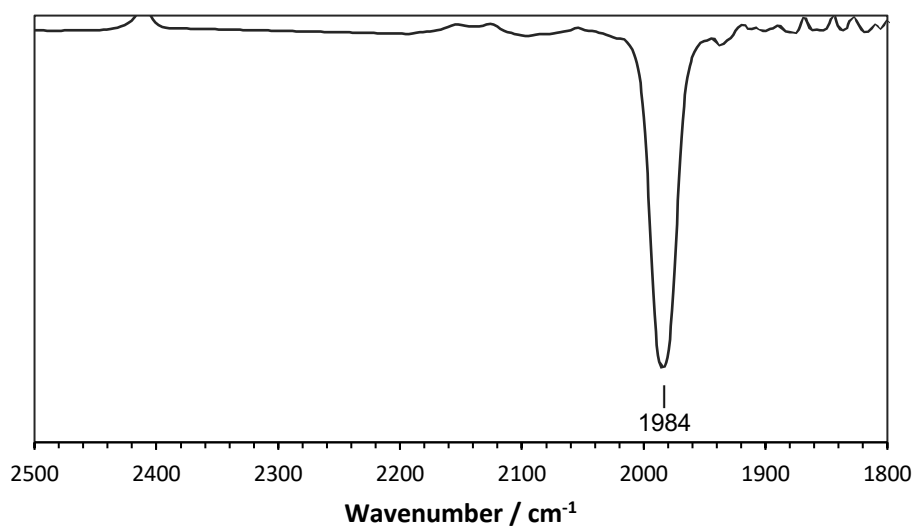

**Figure S27.** IR spectrum of isolated **8** recorded in CH<sub>2</sub>Cl<sub>2</sub>.

## 5 NMR scale reaction of [Ir(PNP-*t*Bu)(biph)][BAr<sup>F</sup><sub>4</sub>] (**II**) with dihydrogen

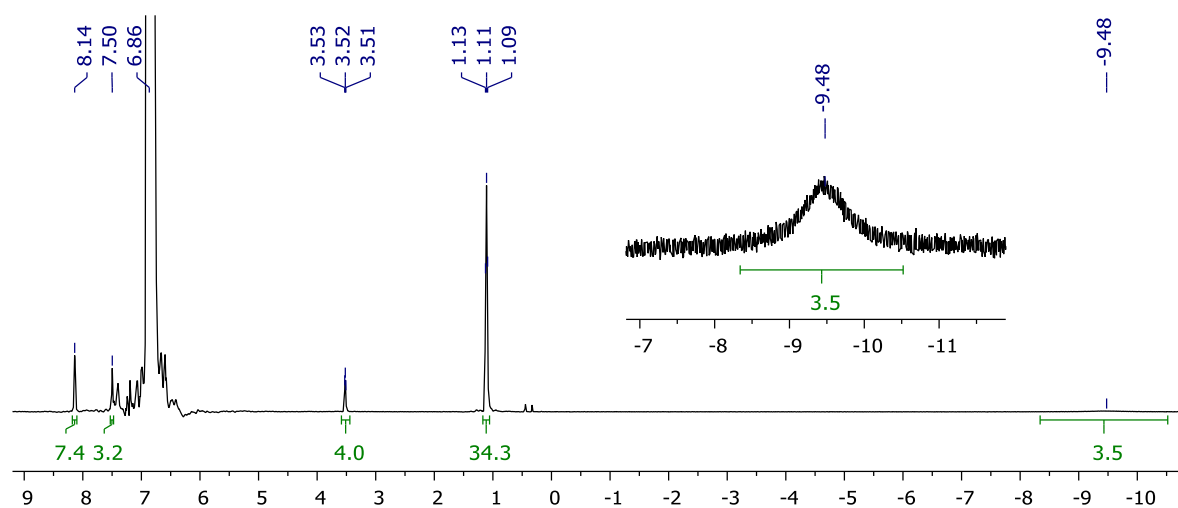

**Figure S28.** <sup>1</sup>H NMR spectrum showing formation of [Ir(PNP-*t*Bu)H<sub>2</sub>(H<sub>2</sub>)] [BAr<sup>F</sup><sub>4</sub>] (DFB, 400 MHz).

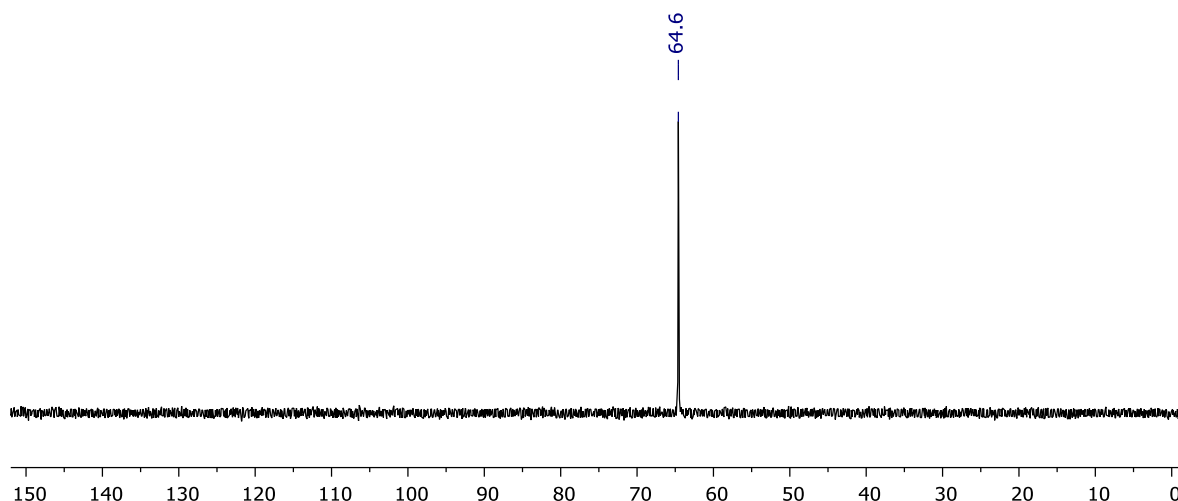

**Figure S29.**  $^{31}\text{P}\{^1\text{H}\}$  NMR spectrum showing formation of  $[\text{Ir}(\text{PNP-}t\text{Bu})\text{H}_2(\text{H}_2)][\text{BAR}^{\text{F}}_4]$  (DFB, 162 MHz).

## 6 Preparation of $[\text{Ir}(\text{PNP-14}^*)\text{H}][\text{BAR}^{\text{F}}_4]$ (7)

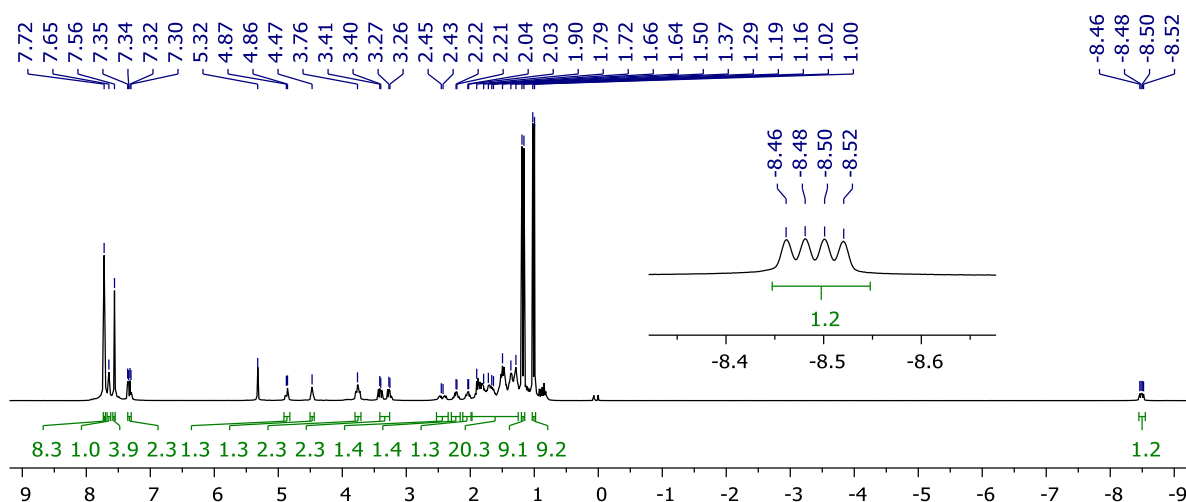

**Figure S30.**  $^1\text{H}$  NMR spectrum of **7** ( $\text{CD}_2\text{Cl}_2$ , 500 MHz).

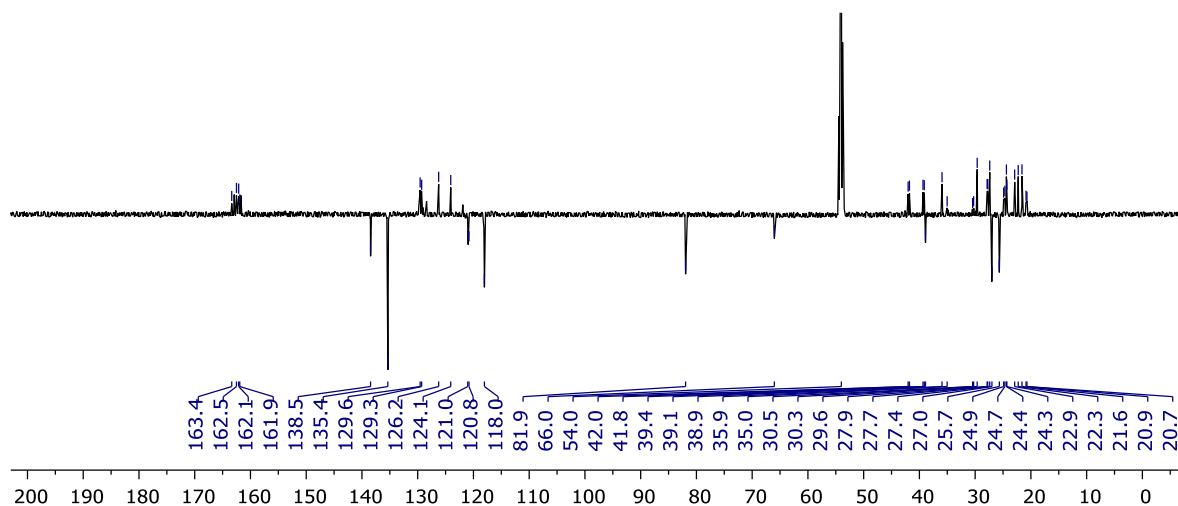

**Figure S31.**  $^{13}\text{C}\{^1\text{H}\}$  APT NMR spectrum of **7** ( $\text{CD}_2\text{Cl}_2$ , 126 MHz).

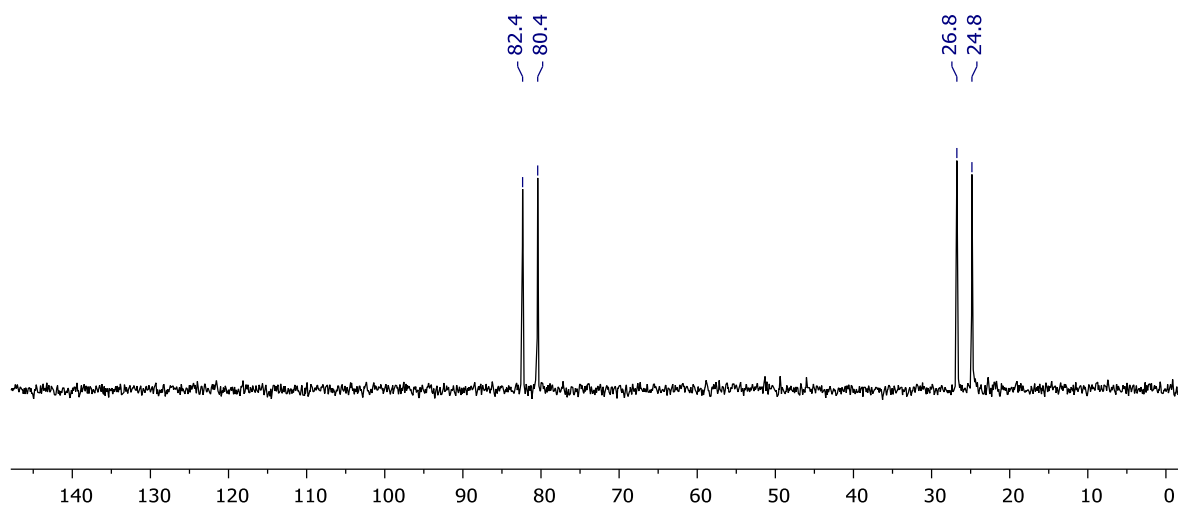

**Figure S32.**  $^{31}\text{P}\{^1\text{H}\}$  NMR spectrum of **7** ( $\text{CD}_2\text{Cl}_2$ , 162 MHz).

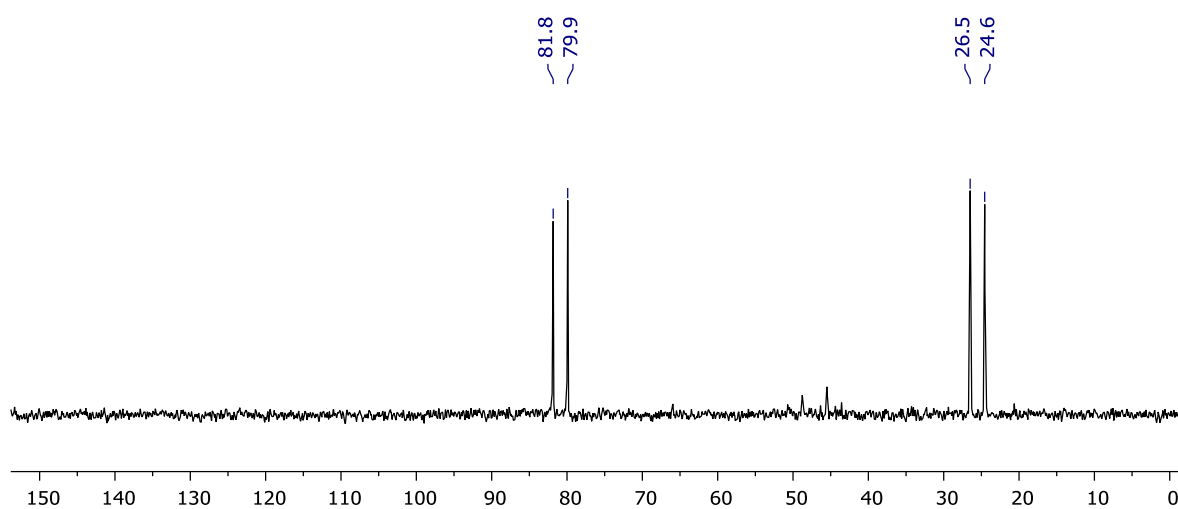

**Figure S33.**  $^{31}\text{P}\{^1\text{H}\}$  NMR spectrum of **7** (DFB, 162 MHz).

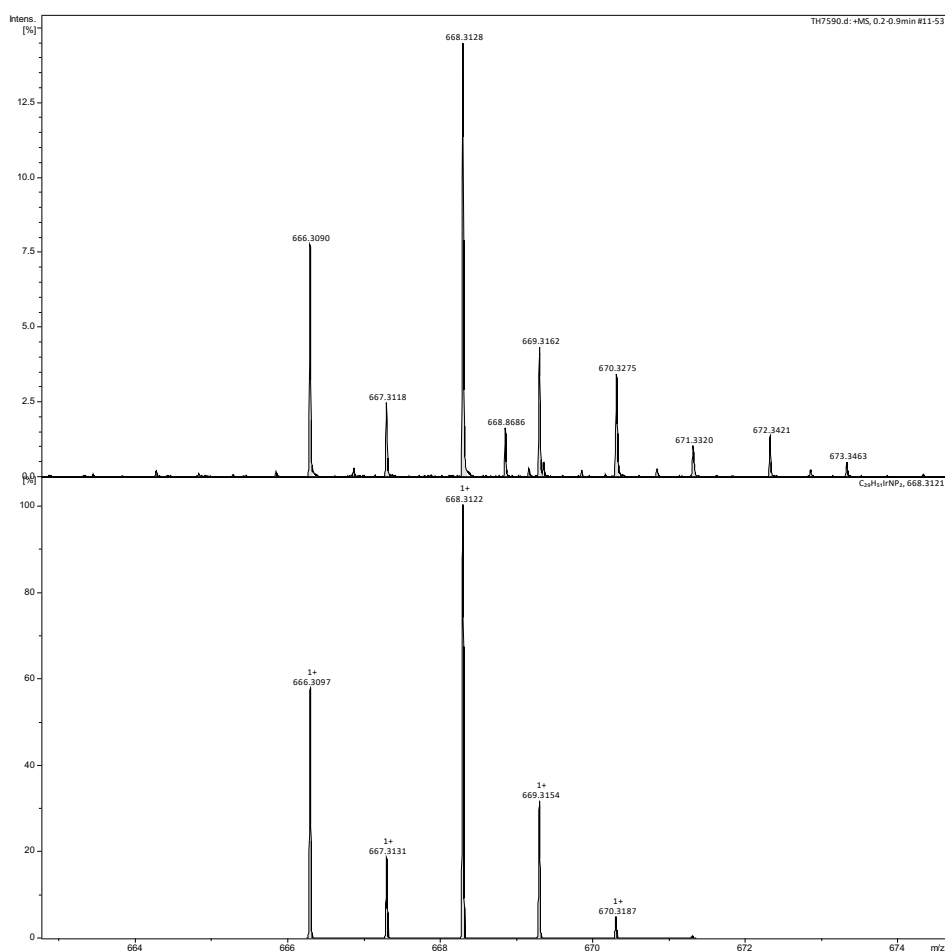

**Figure S34.** HR ESI-MS of **7**.

## 7 NMR scale reaction of **7** with dihydrogen

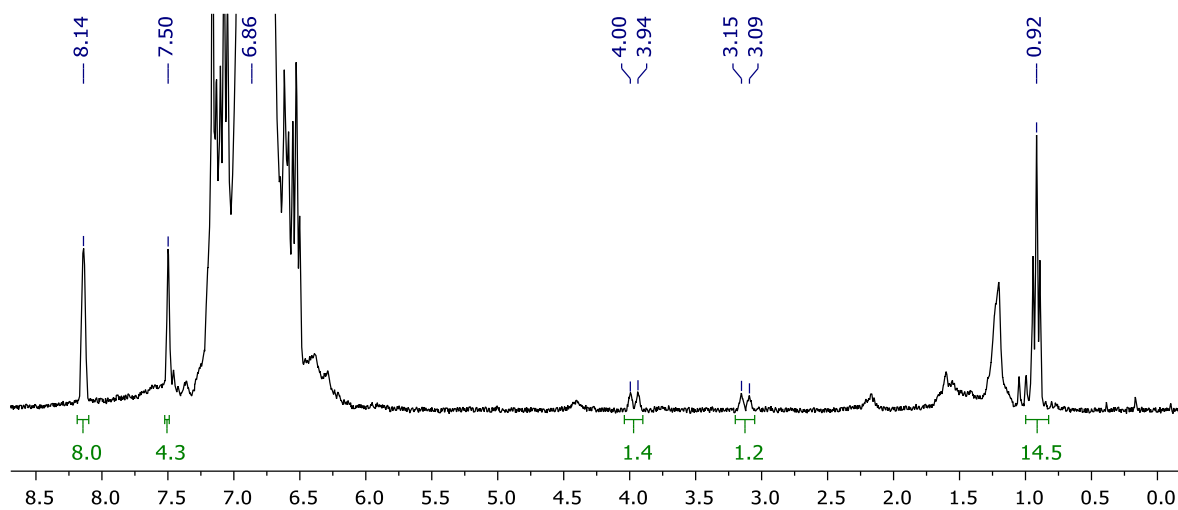

**Figure S35.**  $^1\text{H}$  NMR spectrum showing formation of **4** (DFB, 300 MHz).

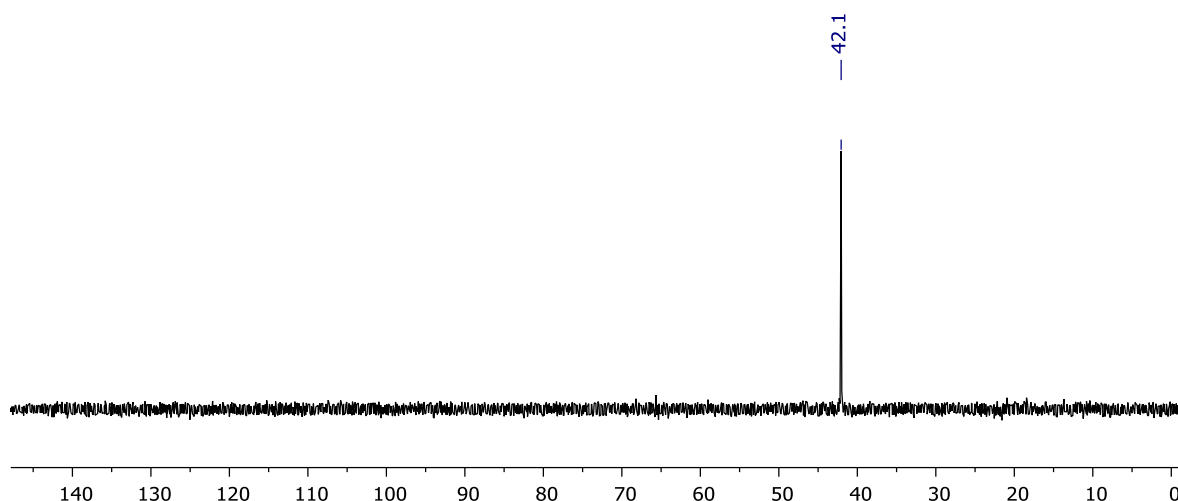

**Figure S36.**  $^{31}\text{P}\{^1\text{H}\}$  NMR spectrum showing formation of **4** (DFB, 121 MHz).

## 8 Catalytic homocoupling of 3,3-dimethylbutyne promoted by **1**

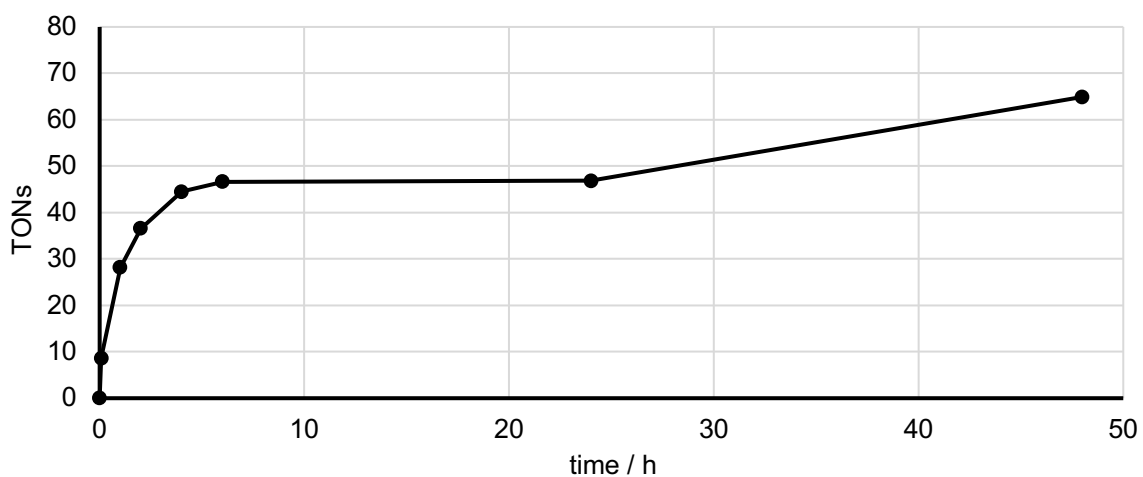

**Figure S37.** Catalytic homocoupling of 3,3-dimethylbutyne promoted by **1** (1 mol%, initially) and producing  $Z$ - $t\text{BuC}\equiv\text{CCHCH}t\text{Bu}$ . Full experimental details provided in the manuscript. An additional 50 equivalents of substrate were added to the reaction mixture after 24 h.



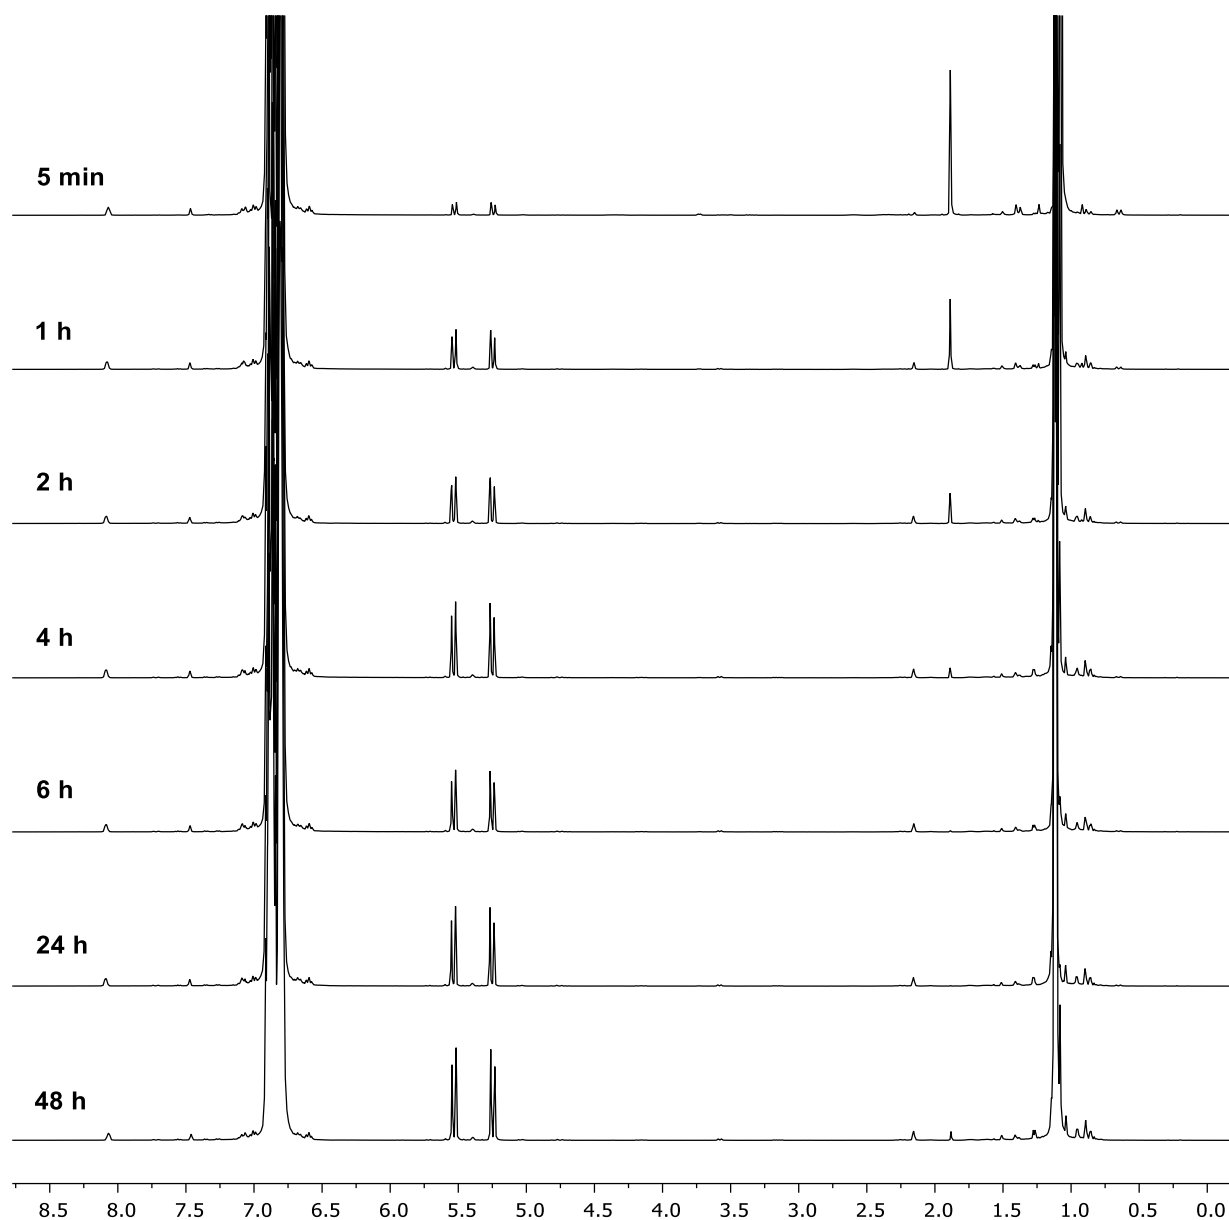

**Figure S38.** <sup>1</sup>H NMR spectra (DFB, 400 MHz) collected during the homocoupling of 3,3-dimethylbutyne promoted by **1** (1 mol%, initially) and producing *Z*-*t*BuC≡CCHCH*t*Bu. Full experimental details provided in the manuscript. An additional 50 equivalents of substrate were added to the reaction mixture after 24 h.

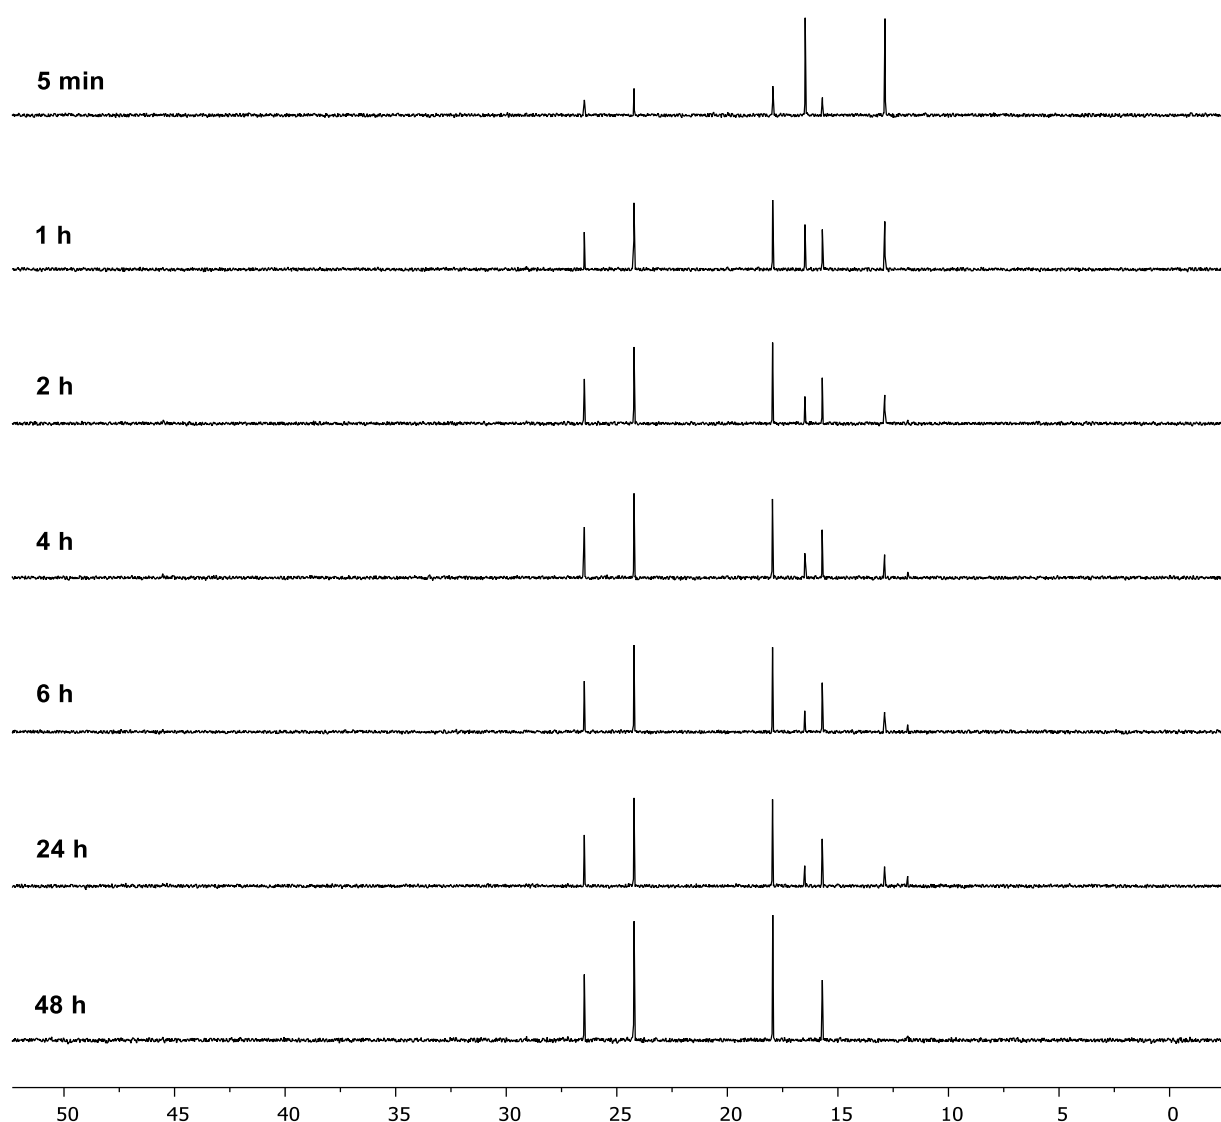

**Figure S39.**  $^{31}\text{P}\{^1\text{H}\}$  NMR spectra (DFB, 162 MHz) collected during the homocoupling of 3,3-dimethylbutyne promoted by **1** (1 mol%, initially) and producing  $Z$ - $t\text{BuC}\equiv\text{CCHCH}t\text{Bu}$ . Full experimental details provided in the manuscript. An additional 50 equivalents of substrate were added to the reaction mixture after 24 h.

## 9 Catalytic homocoupling of 3,3-dimethylbutyne promoted by **6**

A solution of **6** (6.4  $\mu\text{mol}$ , generated in situ) in DFB (512  $\mu\text{L}$ ) within a J. Young NMR tube was treated with a solution of 3,3-dimethylbutyne (79  $\mu\text{L}$ , 642  $\mu\text{mol}$ ) and the resulting homocoupling reaction producing only  $Z\text{-}t\text{BuC}\equiv\text{CCHCH}t\text{Bu}$  followed at RT *in situ* using NMR spectroscopy. The solution was mixed constantly when not in the spectrometer. After 6 h the homocoupling was complete and **10** was observed as the major organometallic species (ca. 70%).

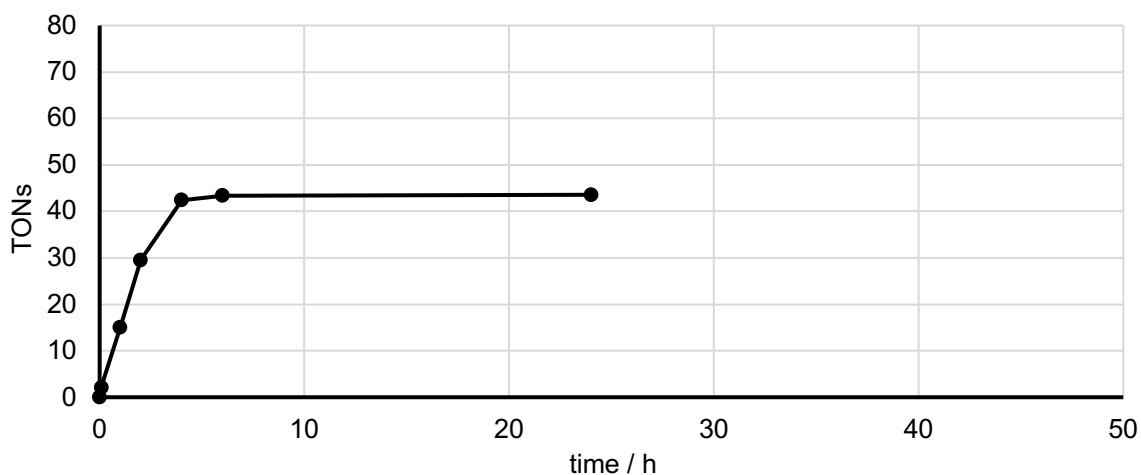

**Figure S40.** Catalytic homocoupling of 3,3-dimethylbutyne promoted by **6** (1 mol%) and producing  $Z\text{-}t\text{BuC}\equiv\text{CCHCH}t\text{Bu}$ .

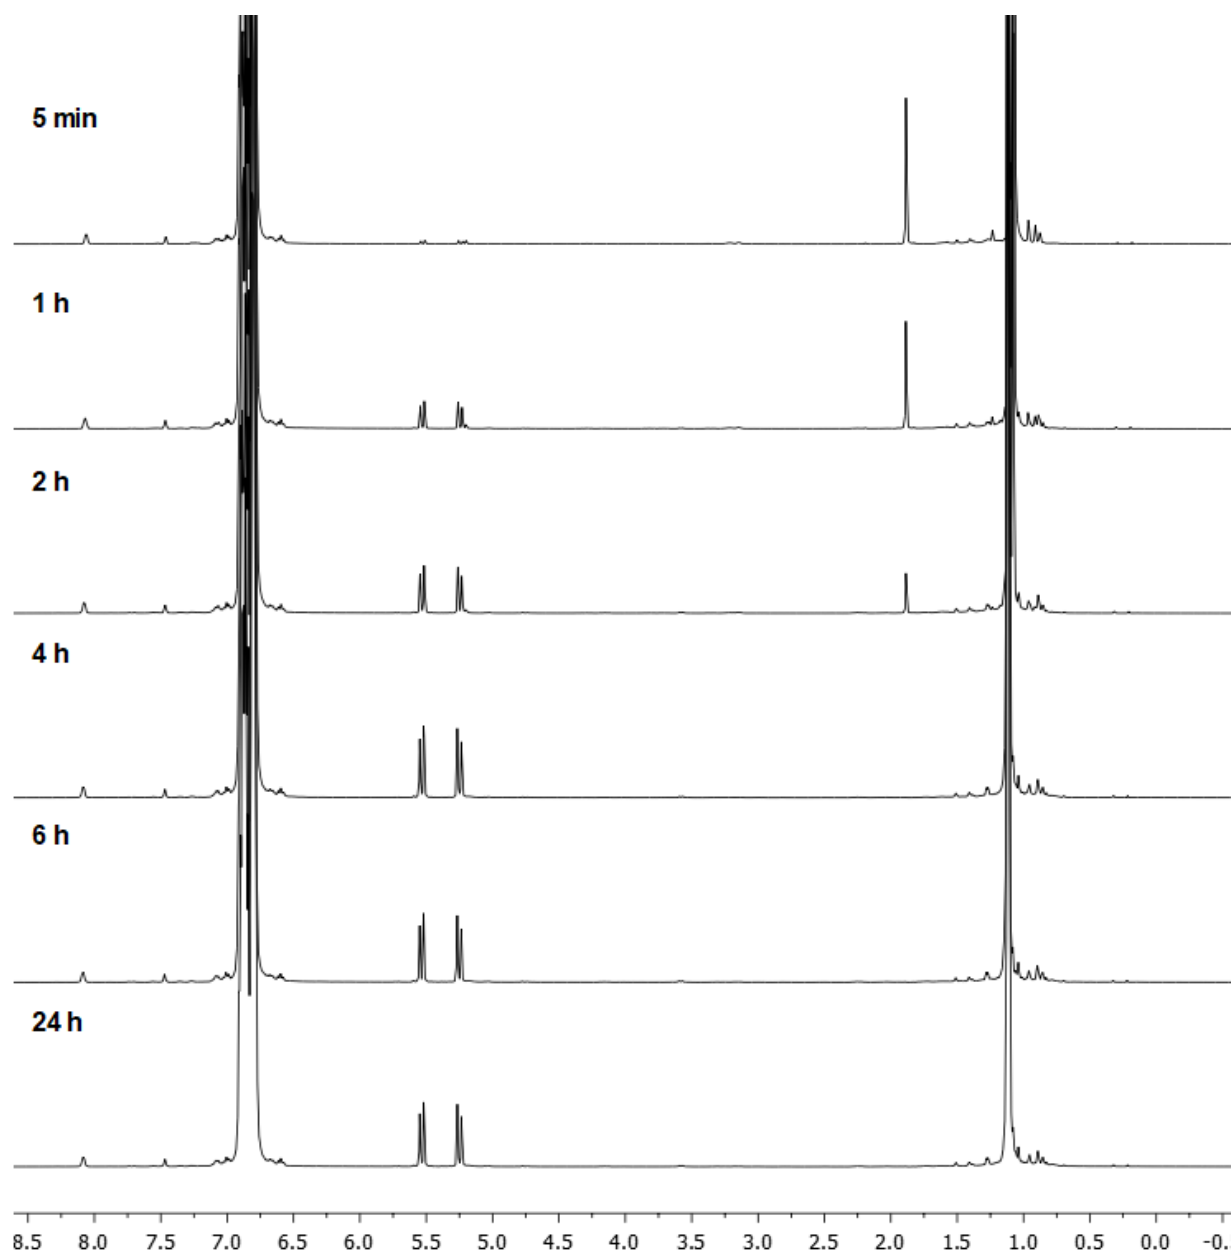

**Figure S41.** <sup>1</sup>H NMR spectra (DFB, 400 MHz) collected during the homocoupling of 3,3-dimethylbutyne promoted by **6** (1 mol%) and producing *Z*-*t*BuC≡CCHCH*t*Bu.

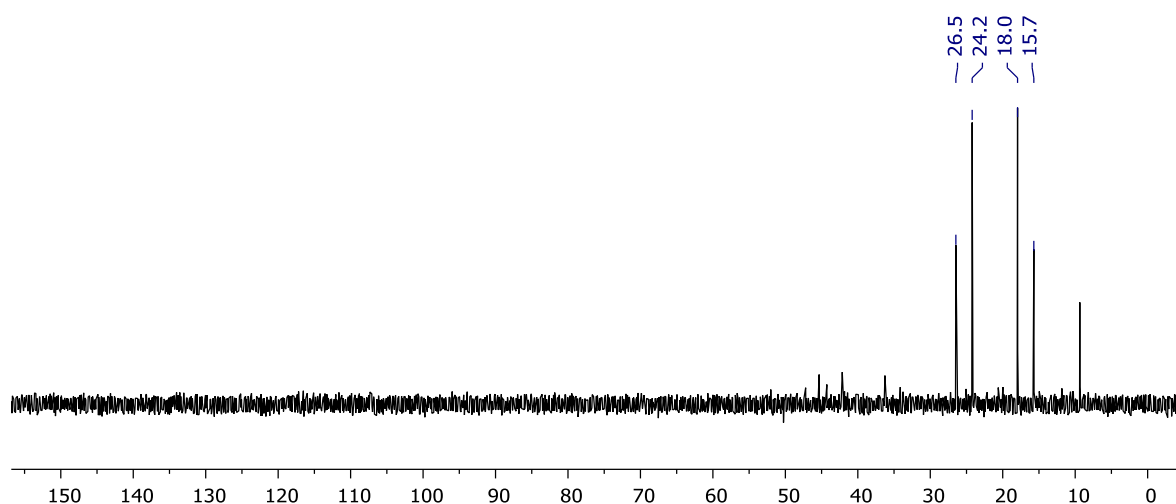

**Figure S42.**  $^{31}\text{P}\{^1\text{H}\}$  NMR spectrum (DFB, 162 MHz) collected during the homocoupling of 3,3-dimethylbutyne promoted by **6** (1 mol%) and producing *Z*-*t*BuC $\equiv$ CCHCH*t*Bu (6 h).

## 10 Preparation of $[\text{Ir}(\text{PNP-14})(\eta^3\text{-E-C}(\text{C}\equiv\text{CtBu})\text{CHtBu})(\eta^1\text{-E-CHCHtBu})][\text{BAR}^{\text{F}}_4]$ (**10**)

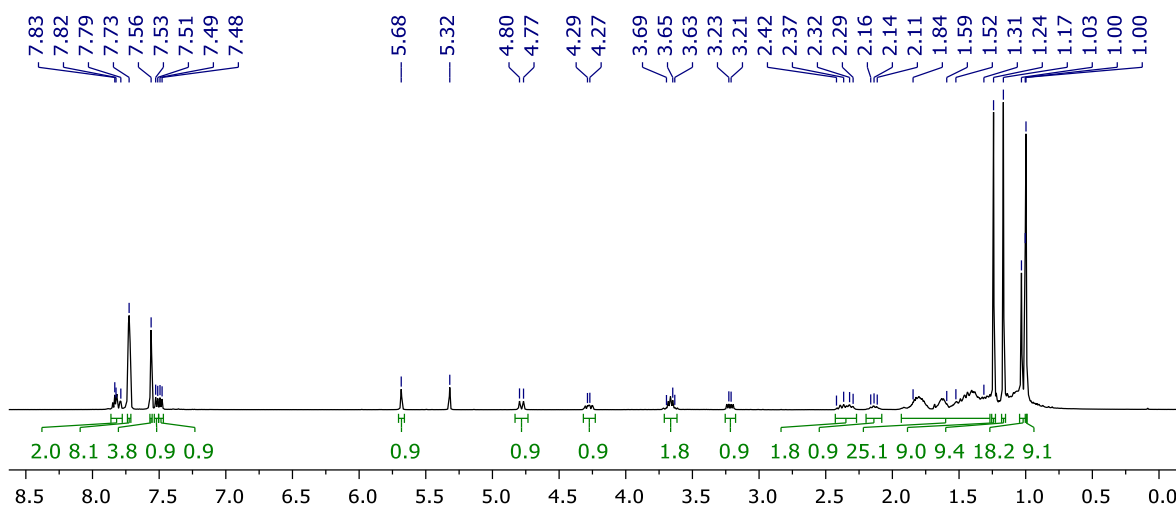

**Figure S43.**  $^1\text{H}$  NMR spectrum of **10** ( $\text{CD}_2\text{Cl}_2$ , 500 MHz).

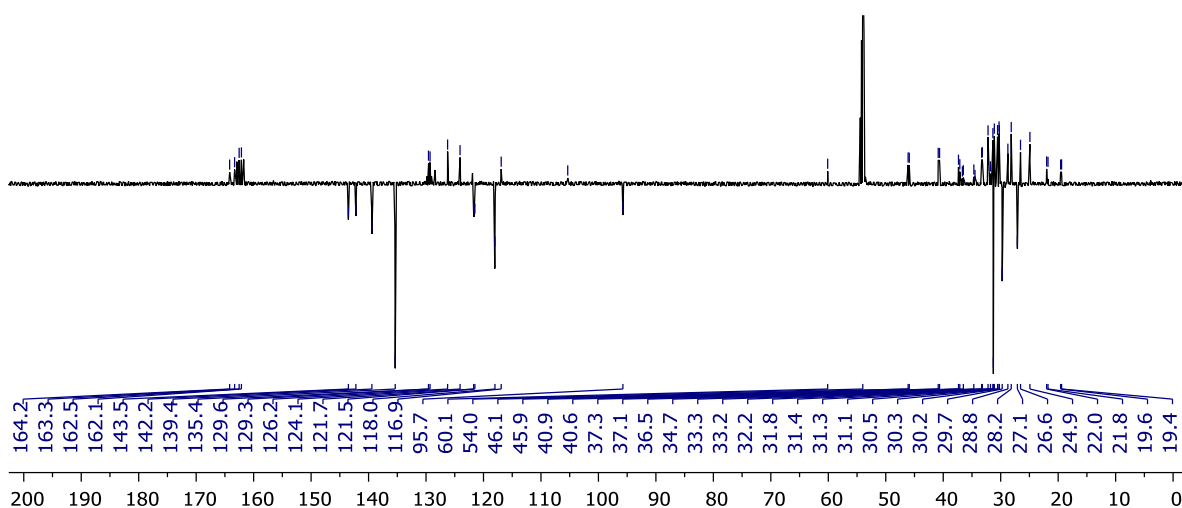

**Figure S44.**  $^{13}\text{C}\{^1\text{H}\}$  APT NMR spectrum of **10** ( $\text{CD}_2\text{Cl}_2$ , 126 MHz).

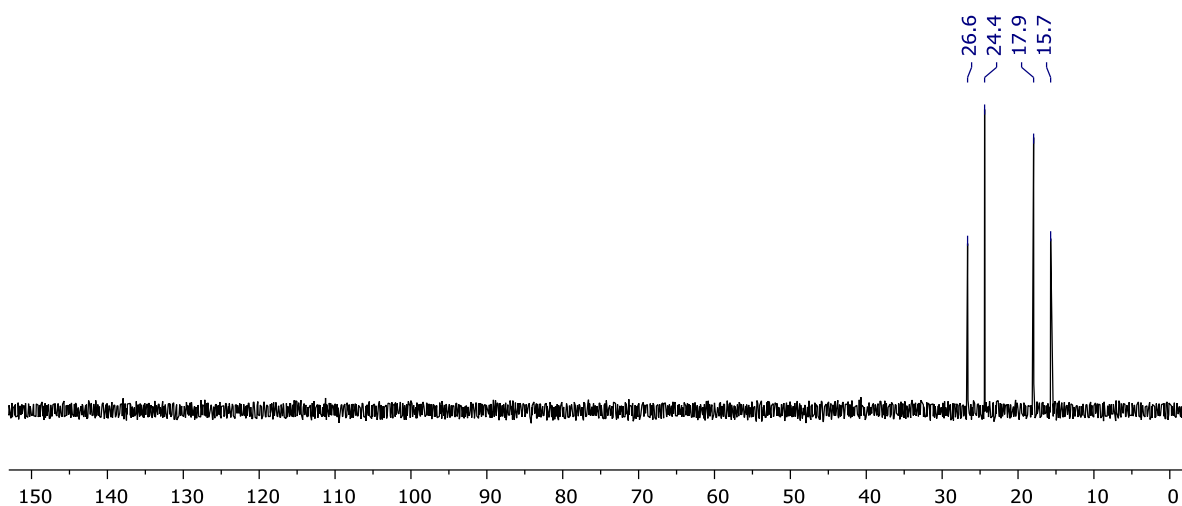

**Figure S45.**  $^{31}\text{P}\{^1\text{H}\}$  NMR spectrum of **10** ( $\text{CD}_2\text{Cl}_2$ , 162 MHz).

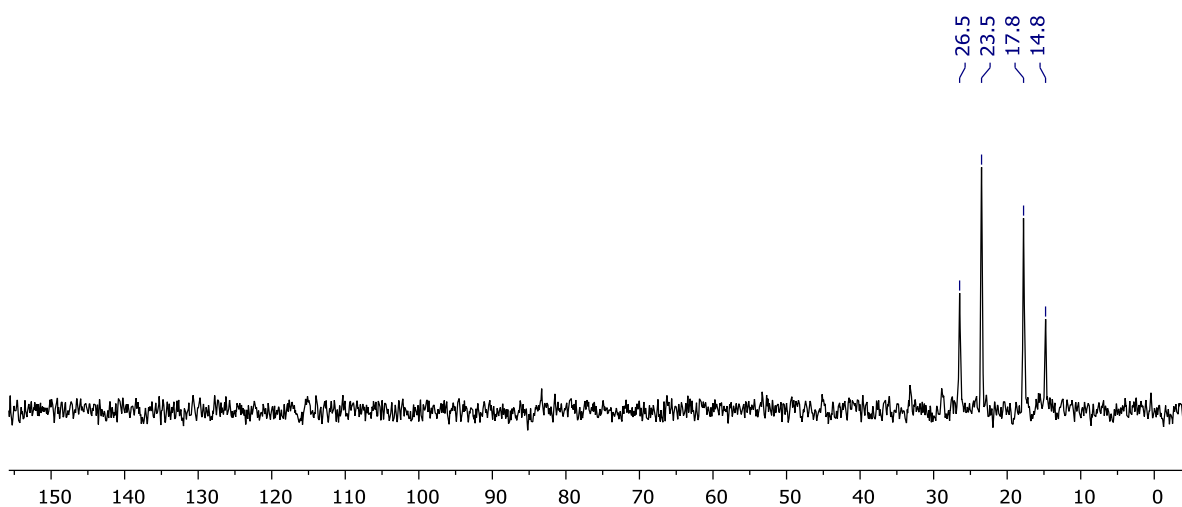

**Figure S46.**  $^{31}\text{P}\{^1\text{H}\}$  NMR spectrum of **10** (DFB, 121 MHz).

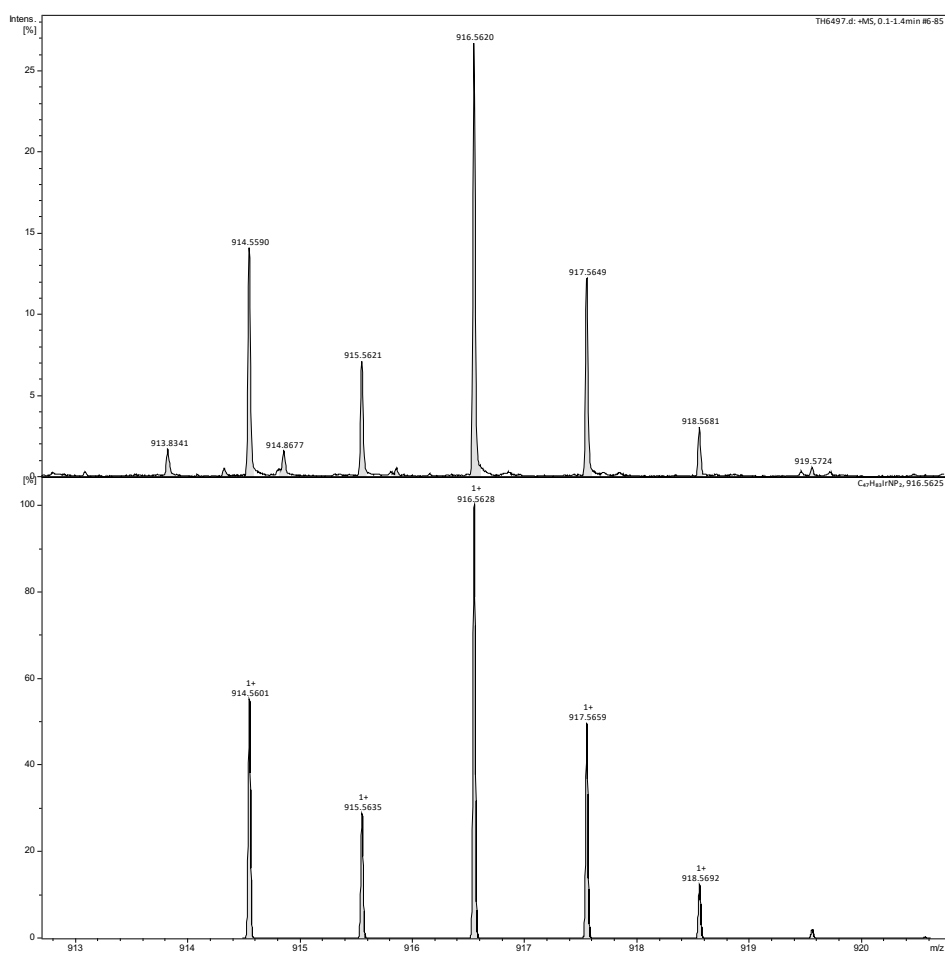

**Figure S47.** HR ESI-MS of **10**.

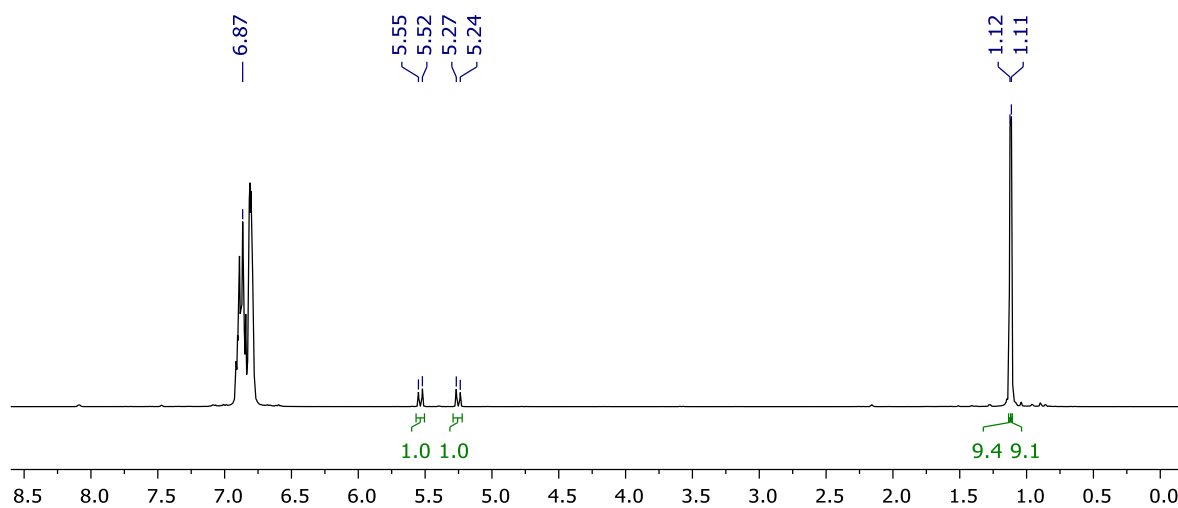

**Figure S48.**  $^1\text{H}$  NMR spectrum of  $Z\text{-}f\text{BuC}\equiv\text{CCHCH}f\text{Bu}$  isolated during the preparation of **10** (DFB, 400 MHz).

## 11 NMR scale reaction of **1** with $Z$ - $t$ BuC $\equiv$ CCHCH $t$ Bu

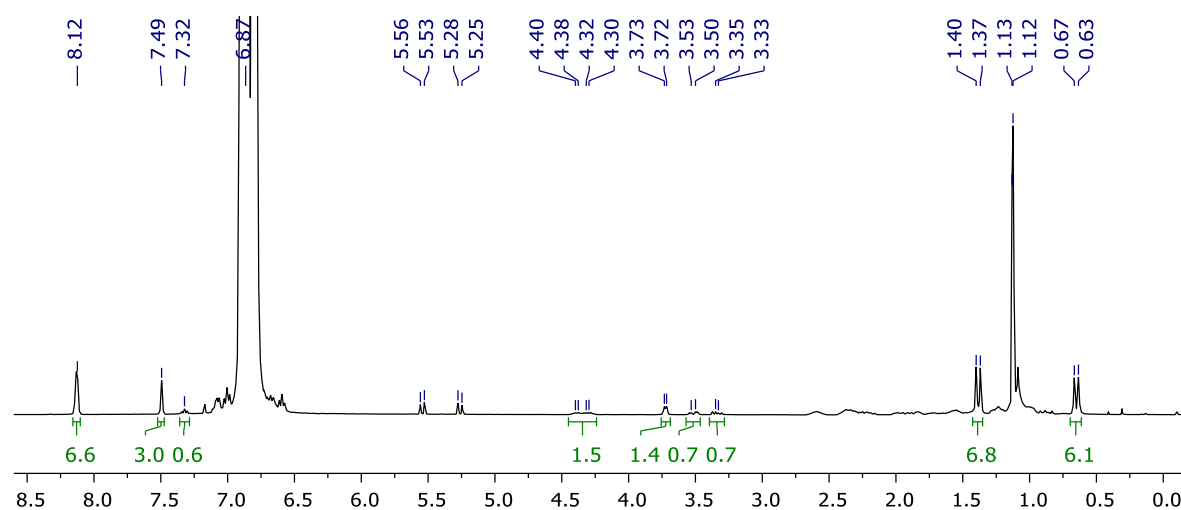

**Figure S49.**  $^1\text{H}$  NMR spectrum of the reaction of **1** with  $Z$ - $t$ BuC $\equiv$ CCHCH $t$ Bu (DFB, 400 MHz).

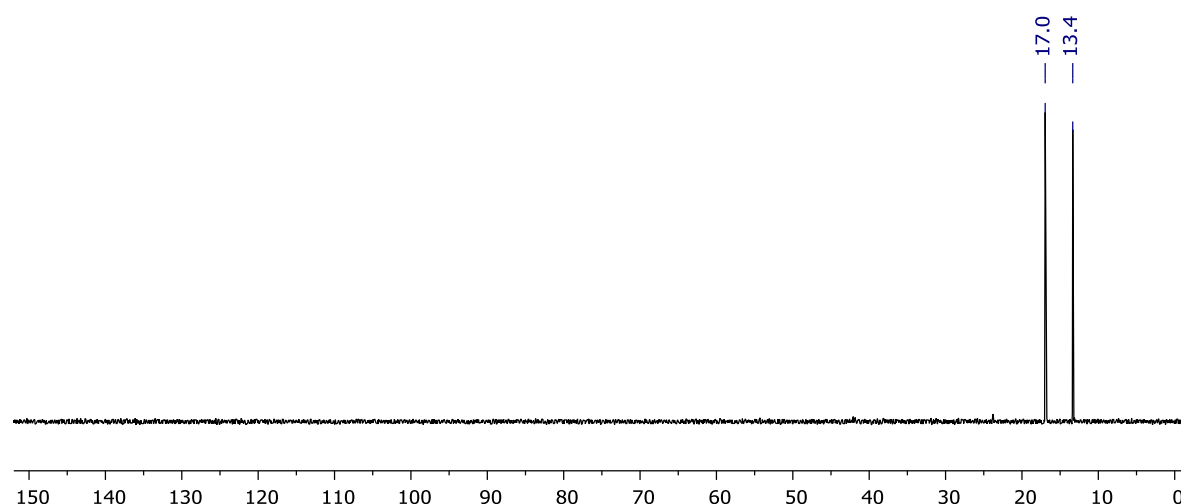

**Figure S50.**  $^{31}\text{P}\{^1\text{H}\}$  NMR spectrum of the reaction of **1** with  $Z$ - $t$ BuC $\equiv$ CCHCH $t$ Bu (DFB, 162 MHz).

## 12 Synthesis and characterisation of $[\text{Rh}(\text{PNP-14})(\eta^2\text{-norbornene})][\text{BAR}^{\text{F}}_4]$

A solution of  $[\text{Rh}(\text{PNP-14})(\text{H}_2)][\text{BAR}^{\text{F}}_4]$  (18.6  $\mu\text{mol}$ , generated *in situ* as described in *Dalton Trans.*, 2020, **49**, 2077 – 2086) in DFB (314  $\mu\text{L}$ ) was treated with a solution of norbornene in DFB (186  $\mu\text{L}$ , 0.50 M, 93.0  $\mu\text{mol}$ ) and stirred at RT for 16 h. The volatiles were removed *in vacuo* and the resulting yellow oil washed with  $\text{SiMe}_4$  ( $2 \times 0.5$  mL) and then dried under vacuum. Recrystallisation by slow diffusion of  $\text{SiMe}_4$  into an  $\text{Et}_2\text{O}$  solution at 4  $^\circ\text{C}$  afforded the product as a yellow crystalline solid. Yield: 19.8 mg (12.9  $\mu\text{mol}$ , 69%).

$^1\text{H}$  NMR (500 MHz, DFB):  $\delta$  8.11 – 8.16 (m, 8H, Ar $^{\text{F}}$ ), 7.50 (br, 4H, Ar $^{\text{F}}$ ), 7.45 (t,  $^3J_{\text{HH}} = 7.7$ , 1H, py), 7.13 (obscured, 1H, py), 7.05 (obscured, 1H, py), 3.67 (app t,  $J = 7$ , 1H, Rh(CH=CH)), 3.03 – 3.30 (m, 5H,  $4 \times \text{pyCH}_2 + 1 \times \text{Rh}(\text{CH=CH})$  [ $\delta$  3.15]), 2.84 (br d,  $^3J_{\text{HH}} = 3.3$ , 1H, CH{NBE}), 2.81 (br d,  $^3J_{\text{HH}} = 3.4$ , 1H, CH{NBE}), 0.90 – 2.39 (m, 32H,  $\text{CH}_2 + 4 \times \text{CH}_2\text{CH}_2\{\text{NBE}\}$  [ $\delta$  1.51, 1.26; 1.39, 1.26]), 1.10 (d,



$^3J_{\text{PH}} = 13.9$ , 9H, *t*Bu), 0.86 (br d,  $^2J_{\text{HH}} = 9.1$ , 1H, CHCH<sub>2</sub>CH{NBE}), 0.81 (d,  $^3J_{\text{PH}} = 13.5$ , 9H, *t*Bu), 0.57 (br d,  $^2J_{\text{HH}} = 9.0$ , 1H, CHCH<sub>2</sub>CH{NBE}).

**$^{13}\text{C}\{^1\text{H}\}$  NMR** (126 MHz, DFB):  $\delta$  163.1 (d,  $^2J_{\text{PC}} = 8$ , py), 162.6 (q,  $^1J_{\text{CB}} = 50$ , Ar<sup>F</sup>), 161.2 (d,  $^2J_{\text{PC}} = 7$ , py), 138.1 (s, py), 135.1 (s, Ar<sup>F</sup>), 129.7 (qq,  $^2J_{\text{FC}} = 32$ ,  $^3J_{\text{CB}} = 3$ , Ar<sup>F</sup>), 124.9 (q,  $^1J_{\text{FC}} = 272$ , Ar<sup>F</sup>), 121.0 (d,  $^3J_{\text{PC}} = 9$ , py), 119.8 (d,  $^3J_{\text{PC}} = 11$ , py), 117.6 (sept,  $^3J_{\text{FC}} = 4$ , Ar<sup>F</sup>), 66.7 (app t,  $J = 10$ , Rh(CH=CH)), 62.9 (dd,  $J = 10, 8$ , Rh(CH=CH)), 47.1 (s, CH{NBE}), 44.4 (d,  $J = 2$ , CH{NBE}), 41.0 (d,  $J = 2$ , CHCH<sub>2</sub>CH{NBE}), 39.0 (dd,  $^1J_{\text{PC}} = 19$ , pyCH<sub>2</sub>), 38.3 (d,  $^1J_{\text{PC}} = 18$ , pyCH<sub>2</sub>), 34.4 (d,  $^1J_{\text{PC}} = 18$ , *t*Bu{C}), 33.6 (dd,  $^1J_{\text{PC}} = 15$ ,  $^3J_{\text{PC}} = 6$ , *t*Bu{C}), 31.6 (d,  $^2J_{\text{PC}} = 11$ , CH<sub>2</sub>), 30.2 (d,  $^2J_{\text{PC}} = 10$ , CH<sub>2</sub>), 30.1 (s, CH<sub>2</sub>), 29.8 (s, CH<sub>2</sub>), 29.5 (s, CH<sub>2</sub>), 29.3 (s, 2×CH<sub>2</sub>), 28.6 (s, CH<sub>2</sub>), 27.9 (s, CH<sub>2</sub>), 27.7 (s, CH<sub>2</sub>), 27.5 (s, CH<sub>2</sub>), 27.4 (d,  $^2J_{\text{PC}} = 4$ , *t*Bu{CH<sub>3</sub>}), 27.2 (d,  $^2J_{\text{PC}} = 5$ , *t*Bu{CH<sub>3</sub>}), 26.9 (s, CH<sub>2</sub>), 26.6 (s, CH<sub>2</sub>), 25.1 (br d,  $^1J_{\text{PC}} = 16$ , PCH<sub>2</sub>), 23.9 (d,  $^3J_{\text{PC}} = 2$ , CH<sub>2</sub>), 20.7 (br d,  $^1J_{\text{PC}} = 23$ , PCH<sub>2</sub>).

**$^{31}\text{P}\{^1\text{H}\}$  NMR** (162 MHz, DFB):  $\delta$  71.2 (dd,  $^2J_{\text{PP}} = 244$ ,  $^1J_{\text{RhP}} = 131$ , 1P), 55.9 (dd,  $^2J_{\text{PP}} = 244$ ,  $^1J_{\text{RhP}} = 125$ , 1P).

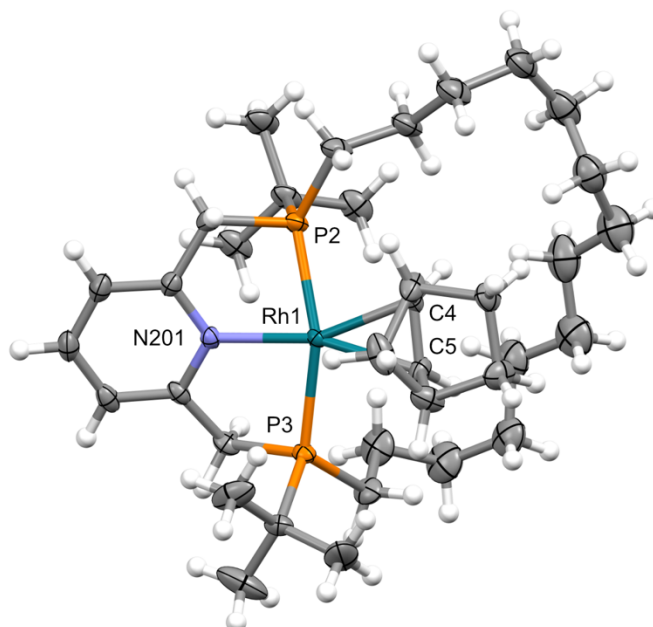

**Figure S51.** Solid-state structure of [Rh(PNP-14)( $\eta^2$ -norbornene)][BARF<sub>4</sub>]; thermal ellipsoids at 30% probability; anion omitted. Selected bond lengths (Å) and angles (°): Rh1-P2, 2.2916(8); Rh1-P3, 2.3118(7); P2-Rh1-P3, 153.11(3); Rh1-N201, 2.088(2); Rh1-Cnt(C4,C5), 2.085(3); N201-Rh1-Cnt(C4,C5), 169.19(11); Cnt = centroid.

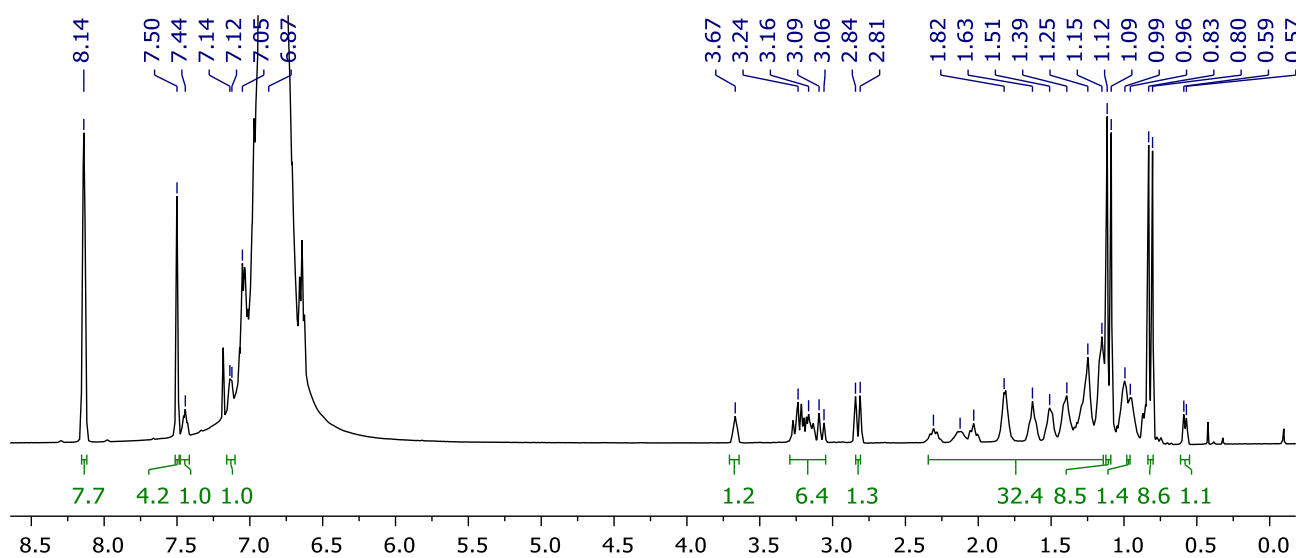

**Figure S52.**  $^1\text{H}$  NMR spectrum of  $[\text{Rh}(\text{PNP-14})(\eta^2\text{-norbornene})][\text{BARF}_4]$  (DFB, 500 MHz).

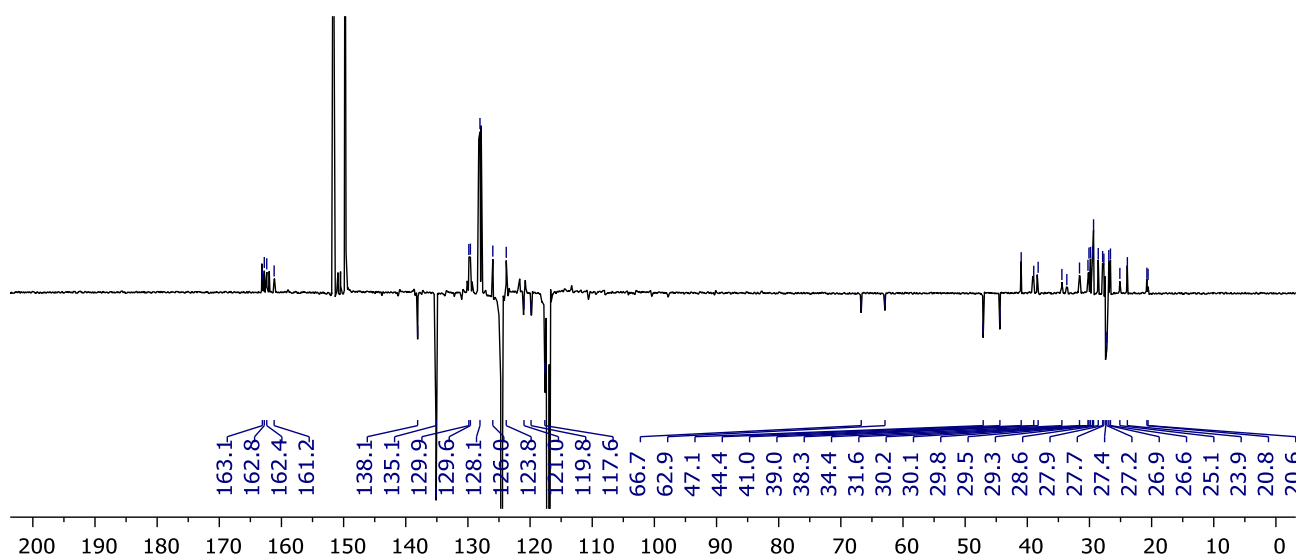

**Figure S53.**  $^{13}\text{C}\{^1\text{H}\}$  APT NMR spectrum of  $[\text{Rh}(\text{PNP-14})(\eta^2\text{-norbornene})][\text{BARF}_4]$  (DFB, 126 MHz).

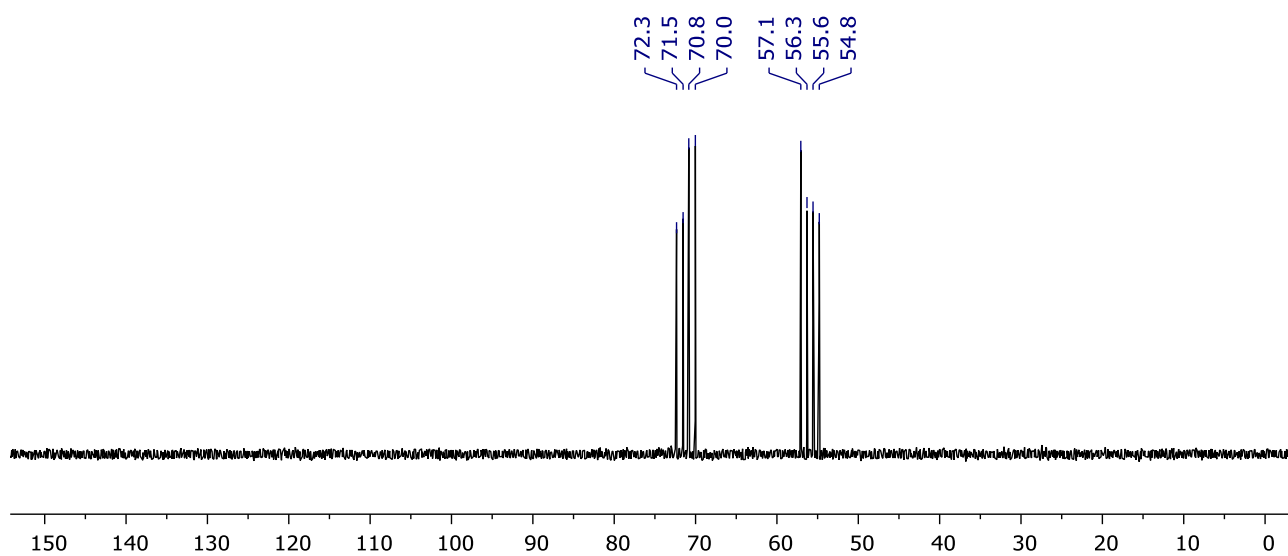

**Figure S54.**  $^{31}\text{P}\{^1\text{H}\}$  NMR spectrum of  $[\text{Rh}(\text{PNP-14})(\eta^2\text{-norbornene})][\text{BARF}_4]$  (DFB, 162 MHz).
